# 1 **A cancer stem cell population underlies a multi-lineage phenotype and drug** 2 **resistance in prostate cancer**

3 Michael L. Beshiri<sup>1</sup>, Brian J. Capaldo<sup>1</sup>, Ross Lake<sup>1</sup>, Anson T. Ku<sup>1</sup>, Danielle Burner<sup>1</sup>, Caitlin M.  
4 Tice<sup>1</sup>, Crystal Tran<sup>1</sup>, Julianna Kostas<sup>1</sup>, Aian Neil Alilin<sup>1</sup>, JuanJuan Yin<sup>1</sup>, Supreet Agarwal<sup>1</sup>,  
5 Samantha A. Morris<sup>2,3,4</sup>, Fatima H. Karzai<sup>5</sup>, Tamara L. Lotan<sup>6</sup>, William L. Dahut<sup>5</sup>, Adam G.  
6 Sowalsky<sup>1</sup>, Kathleen Kelly<sup>1\*</sup>

7 <sup>1</sup>Laboratory of Genitourinary Cancer Pathogenesis, Center for Cancer Research, National Cancer  
8 Institute, NIH, Bethesda, Maryland.

9 <sup>2</sup>Department of Developmental Biology, Washington University School of Medicine in St Louis,  
10 St Louis, MO, USA.

11 <sup>3</sup>Department of Genetics, Washington University School of Medicine in St Louis, St Louis, MO,  
12 USA.

13 <sup>4</sup>Center of Regenerative Medicine, Washington University School of Medicine in St Louis, St  
14 Louis, MO, USA.

15 <sup>5</sup>Genitourinary Malignancies Branch, National Cancer Institute, NIH, Bethesda, Maryland.

16 <sup>6</sup>Department of Pathology, Johns Hopkins University School of Medicine, Baltimore, MD, USA.

17 \*Corresponding author. Email: [kellyka@mail.nih.gov](mailto:kellyka@mail.nih.gov)

18

## 19 **SUMMARY**

20

21 To resist lineage-dependent therapies, cancer cells adopt a plastic stem-like state, leading to  
22 phenotypic heterogeneity. Here we dissect the cellular origins of such heterogeneity in a  
23 metastatic castration-resistant prostate cancer (CRPC) patient-derived adenocarcinoma organoid  
24 model displaying a range of luminal and neuroendocrine phenotypes and driven by mutations in  
25 cell cycle (*CDKN1B*) and epigenetic (*ARID1A*, and *ARID1B*) regulators. As shown by lineage  
26 tracing, metastatic tumor heterogeneity originated from distinct subclones of infrequent  
27 stem/progenitor cells that each produced a full distribution of differentiated lineage markers,  
28 suggesting multiclonal evolution to a relatively stable bipotential state. Single cell ATAC-seq  
29 analyses revealed the co-occurrence of transcription factor activities associated with multiple  
30 disparate lineages in the stem/progenitors: WNT and RXR stem factors, AR and FOXA1 luminal  
31 epithelial drivers, and NR2F1 and ASCL1 neural factors. Inhibition of AR in combination with  
32 AURKA but not EZH2 blocked tumor growth. These data provide insight into the origins and  
33 dynamics of cancer cell plasticity and stem targeted therapy.

34

## 35 **INTRODUCTION**

36

37 Targeted therapies are designed to attack cancer cells through specific molecular pathways to  
38 maximize impact and minimize general toxicity to the patient. Cancer cells can develop  
39 resistance to targeted therapies through a process of transdifferentiation where drug-sensitive

40 tumor cells modify their lineage to acquire an alternate cellular identity that is not dependent on  
41 the targeted pathway for survival (Beltran et al., 2016; Ping Mu et al., 2017; Quintanal-  
42 Villalonga et al., 2020; Sheng Yu Ku et al., 2017). Transition from an adenocarcinoma (AC) to  
43 neuroendocrine (NE) lineage is common in multiple epithelial cancers including lung and  
44 prostate (Balanis et al., 2019; Quintanal-Villalonga et al., 2020). In metastatic castration-resistant  
45 prostate cancer (mCRPC), a decrease in luminal epithelial identity upon treatment with potent  
46 AR pathway inhibitors (ARPIs) occurs in ~20% of cases (Bluemn et al., 2017; Quintanal-  
47 Villalonga et al., 2020; Rahul Aggarwal et al., 2018). The spectrum of mCRPC phenotypes  
48 encompassed by the term lineage-plasticity is broad and thought to exist along a continuum  
49 (Labrecque et al., 2019). Common phenotypes include the AR<sup>-</sup>/NE<sup>+</sup> small cell neuroendocrine  
50 prostate cancer (scNEPC) that is frequently driven by the loss of both *RBI* and *TP53* (Beltran et  
51 al., 2016); an AR<sup>-</sup>/NE<sup>-</sup> double-negative subtype shown to bypass AR-dependence through  
52 FGF/MAPK signaling (Bluemn et al., 2017); and an AR<sup>+</sup>/NE<sup>+</sup> combined (amphicrine)  
53 adenocarcinoma lineage that gains NE features while maintaining AR activity at least in part  
54 through downregulation of RE1 silencing transcription factor (REST) activity (Labrecque et al.,  
55 2019).

56  
57 These lineage-plastic subtypes of mCRPC are not static or homogeneous - multiple  
58 subpopulations can exist in a patient tumor, yet the dynamic relationship of the subpopulation  
59 structure is not well understood (Cejas et al., 2021; Labrecque et al., 2019). Epigenetic  
60 mechanisms underlying lineage-plasticity in cancer can instill resistance without genetic clonal  
61 selection (Fennell et al., 2021) and minor subpopulations that are not easily detected in bulk may  
62 command an outsized role in growth and resistance (Sharma et al., 2010). Distinct hierarchical  
63 phenotypes existing at variable frequencies within a tumor often respond differently to the  
64 selective pressure of a given treatment (Sharma et al., 2010). Effective therapies against mCRPC  
65 that has undergone a lineage-switch are not available and the complex heterogeneity of the  
66 phenotypes represents a challenge that is not easily overcome. A detailed characterization and  
67 mapping of subpopulation hierarchy and the molecular drivers that govern it is needed to identify  
68 cellular points of therapeutic vulnerability.

69  
70 Questions regarding the state(s) of transition from AC prostate cancer (ACPC) to various forms  
71 of lineage-plastic mCRPC remain outstanding. These include 1) the role of cancer stem cells, 2)  
72 acquired transcriptional regulators, 3) genetic drivers other than *RBI* and *TP53* loss, and 4)  
73 subpopulation heterogeneity in the evolution of plasticity and the response to subsequent  
74 therapy. A significant barrier in the field continues to be a lack of representative preclinical  
75 models. PDX models of NEPC are available but do not represent the intra-tumoral heterogeneity  
76 observed in patients, and are just one genetically-defined subtype (Cejas et al., 2021). AR<sup>+</sup>/NE<sup>+</sup>  
77 combined lineage patient-derived models present a singular kind of resource to study the  
78 dynamic interplay between the two lineage states. The presence of both AC and NE lineages  
79 allows the dynamic interplay and cellular states bridging the two to be examined and perturbed.  
80 Here we used patient-derived organoid models of AR<sup>+</sup>/NE<sup>+</sup> mCRPC harboring mutations in  
81 *ARIDIA* and *ARIDIB*, that capture the phenotypic and genetic heterogeneity observed in the  
82 patient tumor. We used these models to identify the existence of bipotential stem-like/progenitor  
83 subpopulations underlying growth and phenotypic heterogeneity, and to uncover a molecular  
84 vulnerability in the stem cells that can be effectively targeted to block tumor growth.

85

## 86 RESULTS

87

### 88 Patient-derived organoids with mutations in BAF core complex components demonstrate 89 lineage-plasticity and NE differentiation

90 We established a set of patient-derived organoid models designated NCI-PC35-1 and NCI-PC35-  
91 2 (Beshiri et al., 2018) (PC35-1 and PC35-2) from two spatially-separated needle biopsies of an  
92 mCRPC lymph node metastasis that was histologically AC with islands of NE marker-expressing  
93 cells (Figures 1A and S1A). There was no evidence of neuroendocrine markers in the primary  
94 tumor (Figure S1B). The organoids reflected the pathology of the metastatic tumor with a range  
95 of AC and/or NE-marked populations (Figure 1B). Whole-genome sequencing (WGS)  
96 phylogenetic analysis revealed that PC35-1 and PC35-2 arose from a common ancestor in the  
97 primary tumor featuring genomic mutations with high oncogenic potential: a deep deletion of  
98 *CDKN1B*, a frameshift mutation of *ARID1A* and a small deletion in *ARID1B* (Figures 1C, S2A  
99 and S2B). *ARID1A/B* are core components of the BAF complex, and a reduction of *ARID1A*  
100 and *ARID1B* as we observed (Figure S2A), has been shown to drive carcinogenesis and neural  
101 developmental disorders (Hui Shi, 2020; Jung et al., 2017). The *RBI*, *TP53* and *PTEN* loci were  
102 intact and expressed (Figure S2C). The two PC35 models shared driver mutations and similar  
103 phenotypes but represented divergent clonal populations within the heterogenous tumor.  
104 Phylogenetic analysis showed little geographic co-mingling as PC35-1 and PC35-2, which  
105 demonstrated 77% and 97% exclusive subclonal genomic variants, respectively. Although we  
106 identified an apparent metastasis-specific tandem duplication of the AR enhancer, no additional  
107 known driver mutations were found in the metastatic clones, suggesting epigenetic regulation of  
108 lineage plasticity, consistent with mutations in the BAF complex (Figures 1C and S2D). Here we  
109 have captured a dynamic, multi-lineage phenotype of a patient tumor in an experimentally  
110 tractable model, enabling molecular and cellular investigation of naturally-occurring lineage-  
111 plasticity.

112

### 113 PC35 organoids are composed of cells from luminal epithelial, neuroendocrine, or stem cell 114 lineages, which display differential proliferation capacity

115 All possible combinations of AR and NE marker (*CHGA*) expression status were observed in  
116 individual cells: (1) AR-pos/*CHGA*-low-neg; (2) AR-neg/*CHGA*-high; (3) AR-pos/*CHGA*-high;  
117 (4) AR-neg/*CHGA*-low-neg (Figure 1D). Further, mapping AR-activity and NE signature scores  
118 of bulk RNA-seq data relative to other ACPC and NEPC models and clinical samples placed  
119 PC35-1/2 at the NEPC-adjacent edge of the ACPC cluster, consistent with the pathology and an  
120 early evolutionary step in ACPC lineage switching (Figure 1E). Of note, EdU pulse-chase assays  
121 showed that AR<sup>POS</sup>/*CHGA*<sup>Lo/NEG</sup> cells proliferated faster than *CHGA*<sup>Hi</sup> cells (Figure 2F), yet the  
122 balance of AR:*CHGA* positive cells remained stable over several generations (Figure 2G). PC35-  
123 1/2 grew slowly relative to two scNEPC (LuCaPs 145.2 and 173.1) and two ACPC (PC44 and  
124 PC155) patient-derived organoid models (Figure S2E). Strikingly, in PC35-1/2 only a fraction of  
125 the total cells (~25%) divided in the time it took for the whole population to double (Figure 1H),  
126 indicating that a minor population of cells underwent multiple divisions while the majority of  
127 cells were not proliferative. By contrast, all cells divided in the scNEPC models, and most but  
128 not all cells in the two ACPC models (Figure 1H). These observations in PC35-1/2 imply a  
129 constitutive program of multi-lineage commitment coupled with subpopulation-restricted  
130 growth.

131

132 To better understand the heterogeneity and subpopulation dynamics of the organoid models, we  
133 performed single-cell RNA-sequencing (scRNA-seq). By this method we identified two major  
134 clusters (I, II) in PC35-1 and three (I, II, and III) in PC35-2, with a heterogeneous range of  
135 lineage phenotypes (Figure 2A). The heterogeneity of the major clusters was delineated into  
136 subclusters designated with Greek letters (Figure 2A) that could be distinguished by phenotype  
137 based on AR, NE, and proliferation (PRLF) signature scores (Figures 2B–2D and S3A), lineage  
138 marker expression (Figures S3B and S3C) and cell cycle profile (Figure S3D). Additionally, we  
139 performed RNA-velocity analysis (La Manno et al., 2018) on the data to infer temporal states of  
140 differentiation (Figure S4). Based on the overlap with the signature scores, lineage marker  
141 expression, RNA-velocity vector patterns and cell cycle state, the subclusters from (Figure 2A)  
142 were categorized with respect to lineage and differentiation status.  $\alpha$  clusters showed features of  
143 stem/progenitor cells (s/p), including a high proliferation score, strong enrichment of  
144 proliferation and stem marker gene expression (TK1, EZH2, AURKA, HES4), long RNA  
145 velocity vectors showing a multidirectional pattern, and a prominent G2/M transcriptional  
146 profile.  $\alpha'$  in PC35-2 has most features of the stem/progenitors that begin to decline at the distal  
147 end proximal to the  $\beta$  cluster, likely as they transition to a more differentiated state.  $\beta$  and  $\delta$   
148 clusters were the most adenocarcinoma-like, featuring a high AR signature score, low NE score,  
149 strong enrichment of ACPC marker gene expression (AR, KLK3), no enrichment of the G2/M  
150 state, a low proliferation score compared to the progenitor group, and a more uniform direction  
151 of RNA velocity vectors. The  $\gamma$  subclusters showed the most neuroendocrine-like differentiation  
152 with a high NE score, a low AR signature score, strong enrichment of NE marker gene  
153 expression (CHGA, SCG2), no enrichment of the G2/M state, a low proliferation score, and a  
154 uniform direction of short RNA velocity vectors. The  $\epsilon$  subcluster of PC35-1 was heterogeneous  
155 for all features and did not have a clear lineage. Within the PC35 models, PC35-1 major cluster  
156 II was an exception as it lacked a high degree of heterogeneity and scored uniformly NE-  
157 high/AR-low and PRLF low. In contrast to PC35-1/2, the ACPC model PC44 and NEPC model  
158 LuCaP 145.2 were homogenous in their respective lineages and PRLF scores, indicating a more  
159 equal proliferative potential for all/most cells in the population (Figures 2B-2D). In summary,  
160 heterogeneity of PC35-1/2 captured from the patient tumor is spread across and within distinct  
161 major clusters with associated proliferative subpopulations, demonstrating both inter- and intra-  
162 clonal lineage-plasticity.

163  
164 To validate the scRNA-seq analysis we performed quantitative single-molecule RNA-FISH  
165 using selected markers on PC35-1/2 organoid-derived cells. In agreement with the scRNA-seq  
166 results, we found that ACPC lineage marker-positive cells were largely distinct from NEPC  
167 marker-positive cells (Figure S5A). Where cells were double positive, they tended to show  
168 reduced expression of one or both markers. EZH2 and TK1 marked the same population of EdU-  
169 positive, dividing cells (Figures S5A-S5C). Double staining for mRNA and protein of selected  
170 lineage markers confirmed a strong positive correlation between mRNA and protein (Figure  
171 S5D). The combined results of the scRNA-seq and RNA-FISH analyses allowed us to finely  
172 resolve and map the phenotypes. The data showed that PC35-1 and PC35-2 were composed of  
173 subpopulations that were generally similar in their transcriptional profiles, but still maintained  
174 discernably unique identities.

175  
176

177 **Simultaneous tracking of lineage and clonal identity with single-cell resolution identifies**  
178 **self-renewing stem-like subpopulations with differentiation potential**

179 To address the dynamic plasticity and the hierarchical structure of the subpopulations, we used  
180 the “CellTagging” method of combinatorial indexing by expressed barcodes read-out by scRNA-  
181 seq, to simultaneously track cellular origin and phenotypic identity within growing organoids  
182 (Bidy et al., 2018). We analyzed single time-point experiments of different durations after  
183 tagging to identify clonal expansion of sibling cells, allowing determination of the clonal  
184 relationships for lineage-marked populations. A separation of four weeks between tagging and  
185 harvest captured uniquely tagged clones in all major clusters. For both PC35-1 and PC35-2 all  
186 tagged clonal sibling cells that were associated with any given major cluster (I, II, III) were  
187 exclusive to that cluster, verifying the clonality of each cluster. The location of tagged sibling  
188 cells is graphically depicted on the UMAPs for PC35-1/2 with black lines connecting clones  
189 (Figures 3A, 3B). Within each major cluster a disproportionate number of the tagged clones were  
190 located entirely within the  $\alpha$  stem/progenitor subclusters (Figures 3A and 3B), indicating that  $\alpha$   
191 was self-renewing. However, tagged clones in subclusters- $\alpha$  also spanned across the  
192 differentiated subclusters within the same major cluster, demonstrating differentiation. The more  
193 differentiated states of the  $\beta$  and  $\gamma$  subclusters showed reduced internal cellular replication,  
194 suggesting that they resulted from the differentiation of subclusters- $\alpha$  (Figures 3A and 3B).  
195 These data demonstrate in a near patient biopsy-derived sample the existence of cancer  
196 stem/progenitor cells (subclusters- $\alpha$ ), which maintain distinct clonal populations (major clusters)  
197 of dynamically differentiating heterogeneous ACPC and NEPC phenotypes.  
198

199 In contrast to the clonal dynamics observed in the PC35 models, the clones captured in LuCaP  
200 145.2 NEPC organoids were indicative of a widely proliferative population. We detected  
201 numerous clones both within and across most clusters that did not show directionality of  
202 expansion (Figure 3C). The ACPC model PC44 exhibited a disproportionately high number of  
203 clones associated with two small clusters; however, unlike the PC35 models, there was no  
204 evidence of self-renewal within those two clusters and like LuCaP 145.2, sibling cells were  
205 widely dispersed within and across nearly all clusters (Figure 3D). Therefore, while we cannot  
206 rule out the existence of progenitor populations in these models, division is not restricted to a  
207 specific subpopulation.  
208

209 **Unique combinations of transcription factor activities are linked to divergent phenotypes**

210 One possible explanation for the discrete clonality of the major clusters in the PC35 models is  
211 that cluster-specific genetic events led to distinct phenotypes, although we were unable to  
212 identify subclonal driver mutations by WGS analyses. We analyzed our scRNA-seq data using  
213 CopyKAT to identify clonal subpopulations based on genomic copy number variation (CNV)  
214 and associated this genomic substructure with the phenotypically-defined major clusters (Gao et  
215 al., 2021). We found a combination of contributions to the different phenotypes of the clusters:  
216 those which were independent of CNV clonal patterns (PC35-1 UMAP clusters I and II, and  
217 PC35-2 cluster I) and those attributed to unique or closely related clonal genotypes (PC35-2  
218 UMAP clusters II and III) (Figures 4A, S6A and S6B). These data suggest that there are fixed  
219 differentiation patterns for pre-existing clonal populations in addition to common pathways of  
220 lineage differentiation. Genetic clones did not show lineage bias toward phenotypic subclusters  
221 ( $\alpha - \epsilon$ ), confirming ongoing dynamic, heterogeneous differentiation (Figures S6A and S6B).  
222



223 To investigate the role of epigenetic regulation on the phenotype of the PC35 models, we  
224 performed single-cell ATAC-seq. Clustering by genome-wide chromatin accessibility yielded  
225 three clusters (*1*, *2*, *3*) in both PC35-1 and PC35-2 (Figure 4B). To look for transcription factors  
226 (TFs) that may be responsible for the differing phenotypes among the clusters, we performed an  
227 analysis of inferred TF activity. Clusters-*3* in both models were distinguished as the most  
228 neuroendocrine-like, exhibiting a relative absence of REST activity and high activity scores for  
229 TFs such as NRF1, HES4 and ONECUT2 (Figures 4C and 4D), similar to previously described  
230 NE models (Balanis et al., 2019). Clusters *1* and *2* in PC35-1/2 demonstrated unique but highly  
231 overlapping combinations of transcription factors contributing to stem cell, luminal epithelial,  
232 and neural phenotypes. Additionally, Clusters *1* and *2* of both models could be partitioned into  
233 two pairs of subclusters *1.1*, *1.2* and *2.1*, *2.2* (Figure 4B). Inferred TF activities in subclusters *1.1*  
234 and *2.1*, were consistent with a stem-like phenotype and included WNT pathway effectors such  
235 as *TCF7* and *TCF7L2*, and retinoid X receptors (Figures 4B-4D) and co-occurred with TFs  
236 determining luminal epithelial (FOXA1, AR, NR3C1) and neural (NR2F1, ASCL1) lineages.  
237 Considering the adenocarcinoma origin of the tumor, these data suggest the gain of stem cell and  
238 NE lineage determining TFs while some luminal TFs remain active. There were no remarkable  
239 TF activities gained in Clusters *1.2* and *2.2* compared to the stemlike *1.1* and *2.1*. On the  
240 contrary, differentiation was mostly associated with reduced TF activity found in the stem-like  
241 clusters (Figures 4B-4D); however, it is possible that the plasticity-associated heterogeneity  
242 across the differentiating population obscured TF patterns. These data denote a model of  
243 plasticity whereby variable activity of a TF program across stem-like/progenitor clones resulted  
244 in distinct cellular phenotypes that share to differing degrees features of ACPC and NEPC  
245 lineages, in addition to a more complete switch to a neuroendocrine program in a small  
246 subpopulation of cells. Thus, it appears that stochastic epigenetic processes acting on cancer  
247 stem cells contribute to lineage differentiation.

248

### 249 **Targeting both AR pathway dependent and independent compartments of the** 250 **stem/progenitor subpopulations inhibits *in vitro* and *in vivo* tumor growth**

251 The existence of multiple identifiable clones propagated by stem/progenitor cells enables  
252 analysis into the heterogeneity of intratumoral resistance mechanisms as well as cancer stem cell  
253 targeted therapeutics. Although CRPC implies a loss of AR-targeted responsiveness, the  
254 presence of potentially disparate resistance mechanisms across multiple clones presents an  
255 important clinical challenge when discontinuing AR suppression therapy. We treated PC35-1 and  
256 PC35-2 organoids with enzalutamide, quantified cell numbers, and found a partial response in  
257 both models, concordant with the notion of a subpopulation-specific dependence on AR  
258 signaling (Figure 5A). PC35-1 showed a greater than two-fold reduction after treatment, while  
259 PC35-2 showed a less than 30% decrease. We then performed RNA-FISH in combination with  
260 EdU to quantify subpopulation-specific changes due to enzalutamide treatment (Figures 5B-5D).  
261 Congruent with the different overall response observed in bulk, we found that enzalutamide  
262 caused a >10-fold reduction to proliferating AR<sup>POS</sup>EdU<sup>POS</sup> cells in PC35-1 while the same  
263 population in PC35-2 showed only a small decrease (Figure 5C). The SCG2-positive,  
264 neuroendocrine-like, populations in both PC35-1/2 were insensitive to enzalutamide (Figure 5D).  
265 To determine whether resistance mapped to a specific subcluster of AR-positive cells, we  
266 identified *MAP3K5/ASK1* as a top differentially expressed gene marking cluster III of PC35-2  
267 (Figure 5E). Proliferating MAP3K5<sup>POS</sup> and AR<sup>POS</sup> MAP3K5<sup>POS</sup> (double-positive) cells were  
268 resistant to enzalutamide, but AR<sup>POS</sup> MAP3K5<sup>NEG</sup> cells were depleted two-fold after treatment

269 (Figure 5F). This result was unexpected given that PC35-2 cluster III had a strong AR signature  
270 score. MAP3K5 is an upstream regulator of *NR3C1*, which was co-enriched in cluster III (Figure  
271 5G) (Perez Kerkvliet et al., 2020). *NR3C1* expression is a well-established ARPI resistance  
272 mechanism that leads to expression of some AR-regulated genes (Arora et al., 2013). These data  
273 demonstrate plasticity-mediated, clonal variability, selected within a patient, leading to partial  
274 ARPI resistance within a population of mCRPC tumor cells.

275  
276 Although AR<sup>POS</sup> cells made up a proportion of the EdU<sup>POS</sup> progenitor population,  $\geq 50\%$  of  
277 stem/progenitor cells were AR-negative (Figure 5C, -Enza columns). To specifically address the  
278 stem/progenitor population, we identified multiple druggable targets as highly enriched in the  
279 stem-like subclusters- $\alpha$  of the PC35 models, including EZH2, AURKA, and the Notch pathway  
280 (Figures S3B and S3C) and targeted them with CPI-1205, Alisertib, or Compound E, (EZH2i,  
281 AURKAi and Notchi respectively). For comparison, we included the chemotherapeutic agent  
282 carboplatin, which is used as a late line of therapy in mCRPC. After initial dose response  
283 determinations by two-week assays, we observed a heterogeneous response potentially indicative  
284 of a subpopulation-specific drug sensitivity/resistance (Figure S7A). We then treated the PC35  
285 organoids with AURKAi, EZH2i, Notchi, carboplatin, or DMSO for six weeks with  
286 concentrations that were selected from the middle of the plateau of the dose-response curves. In  
287 both organoid models, the AURKAi caused a nearly 10-fold decrease in cell number compared  
288 to DMSO while the other drug conditions resulted in only minor reductions (Figure 6A). We  
289 tracked the effect of AURKAi, EZH2i, and carboplatin relative to DMSO with single-cell  
290 resolution using RNA-FISH/EdU combined assays. Subpopulations were identified by marker  
291 gene expression: AR to mark ACPC lineage; SCG2 to mark NEPC lineage; TK1, EZH2 and  
292 AURKA and EdU incorporation to mark stem-like/progenitors. We found that the AURKAi  
293 specifically depleted the stem-like/progenitor subpopulation while carboplatin had no effect  
294 (Figures 6B and 6C). The percentage of AR<sup>POS</sup> cells within the EdU<sup>POS</sup> population decreased  
295 from 40% to about 15% (Figure S7B), demonstrating significant sensitivity of the AR<sup>POS</sup> stem  
296 cell population. We hypothesize that AURKAi-resistant AR<sup>POS</sup> cells may represent either a more  
297 differentiated transit amplifying AR<sup>POS</sup> population or partial intrinsic resistance.

298  
299 Although EZH2 has been shown to regulate a transcriptional program driving a lineage-switch  
300 away from differentiated adenocarcinoma in *RB1*<sup>-/-</sup>, *TP53*<sup>-/-</sup> models (Davies et al., 2021; Ping Mu  
301 et al., 2017; Sheng Yu Ku et al., 2017), we observed only an insignificant increase in AR-  
302 positivity in both PC35-1 and PC35-2 in the EZH2i condition (Figure S7C), and we did not see  
303 upregulation of EZH2 or phospho-EZH2 upon enzalutamide treatment (Figure S7D), suggesting  
304 context-dependence for EZH2-driven mechanisms observed in RB1/TP53 loss models. Together  
305 these results indicate that the stem-like/progenitor subpopulation can be directly targeted by  
306 AURKAi to block growth and imply the existence of a residual AR<sup>POS</sup> proliferative population  
307 with potential sensitivity to AR inhibition.

308  
309 To evaluate how effective inhibition of AURKA and/or AR is at blocking tumor growth *in vivo*,  
310 we treated PC35-1 organoid-derived xenograft tumors for nine weeks with either alisertib (half  
311 standard dose), castration, alisertib combined with castration, or vehicle. Castration or the low  
312 dose of alisertib alone caused a 50% decrease of tumor growth that was not statistically  
313 significant. However, the combination treatment rapidly and dramatically blocked tumor growth  
314 (Figure 6D). In week-nine tumors, castration caused a strong increase in cytoplasmic and

315 decrease in nuclear AR, as well as increased expression of the NE marker, synaptophysin (Figure  
316 S8A). Consistent with the effects on tumor growth, the strong BrdU incorporation observed in  
317 the control was decreased in all the treated conditions, reaching the lowest level in the  
318 combination treatment (Figures S8A and S8B). These results demonstrate that the subpopulation-  
319 specific vulnerabilities that we identified in patient-derived organoids can be exploited to yield  
320 impactful results on tumor growth *in vivo*.

321

## 322 DISCUSSION

323

324 Prostate cancer is dependent upon AR signaling for growth and survival (Huggins, 1972).  
325 Tumors are exquisitely responsive to AR-inhibition upon initial treatment; however, relapse in  
326 the form of castration-resistant disease is incurable despite a continued dependence on the AR  
327 pathway (Attard et al., 2008; Scher and Sawyers, 2005). Second generation AR pathway  
328 inhibitors such as enzalutamide and abiraterone used to treat CRPC effectively block AR  
329 signaling, but still ultimately fail (Attard et al., 2008; Scher et al., 2010). Resistance frequently  
330 occurs through mechanisms that bypass AR signaling, including lineage-switching and  
331 alternative receptor activity such as the glucocorticoid receptor (GR) coded by  
332 *NR3C1* (Buttiglierio et al., 2015). A full appreciation of the molecular and cellular mechanisms  
333 contributing to lineage switching and resistance has been hampered by a lack of tractable,  
334 preclinical models representing the phenotypic complexity of tumors.

335

336 In a set of patient-derived organoid models of the AR<sup>+</sup>/NE<sup>+</sup> phenotype featuring mutations in  
337 *ARID1A* and *ARID1B* subunits of the BAF chromatin-remodeling complex, we report the  
338 existence of clonally-distinct cancer stem/progenitor subpopulations as the source of growth and  
339 phenotypic heterogeneity. The stem/progenitor subpopulations demonstrated co-occurring  
340 transcription factor activities associated with both luminal epithelial and neuroendocrine  
341 lineages. Consistent with this duality of TF activity, the heterogeneity observed at the single-cell  
342 level exhibited all permutations of luminal epithelial and NE lineage marker expression.  
343 Surprisingly, the least proliferative population was the most neuroendocrine-like. This finding is  
344 contrary to the increased growth rate of AR<sup>-</sup> NEPC driven by *RB1* and *TP53* loss, but consistent  
345 with less aggressive NE tumors including gastroenteropancreatic NE neoplasms, breast cancer  
346 with neuroendocrine differentiation, and pulmonary NE carcinoids that are frequently driven by  
347 mutations in *ARID1A* (Cros et al., 2021; Marchio et al., 2017; Puccini et al., 2020).

348

349 Diversified and labile transcriptional programs within a heterogenous tumor cell population can  
350 rapidly confer clonal fitness in the face of therapeutic pressure (Bolis et al., 2021; Davies et al.,  
351 2021; Fennell et al., 2021; Taavitsainen et al., 2021). In our models clonally-determined lineage  
352 distributions were partially explained by pre-existing genomic alterations. In addition, we  
353 observed that highly similar but variable patterns of TF activity across cancer stem cell clones, in  
354 the absence of additional identifiable driver mutations, produced overlapping spectra of lineage  
355 phenotypes. This observation highlights the underlying complexity driving phenotypic  
356 heterogeneity in tumors and suggests contributions from both genetic and epigenetic evolution.

357

358 Although EZH2 has been implicated as an epigenetic factor mediating the loss of plasticity-  
359 associated AR independence using various genetic models of the LNCaP cell line and in RB1  
360 deficient mouse models, this near patient model demonstrated relatively little phenotypic and no



361 growth-related response to EZH2 inhibition. This finding suggests that a fuller understanding of  
362 context-dependent EZH2 activity is needed to use EZH2 inhibitors selectively in patients.

363

364 In addition to lineage-switching, we found ARPI resistance at the subpopulation level mediated  
365 by other known mechanisms, such as high expression of *NR3C1*. This observation indicates that  
366 multiple different paths to resistance are employed by cancer cells within the same tumor,  
367 underscoring the challenges in the development of curative treatments.

368

369 The existence of a stem-like/progenitor subpopulation as the seedbed of growth in a tumor would  
370 have great potential as a point at which to direct therapeutic intervention. We found Aurora  
371 Kinase A, a regulator of mitotic progression, stem cell self-renewal, and asymmetric division  
372 (David M Glover, 1995; Eterno et al., 2016; Wang et al., 2019), to be expressed and restricted to  
373 the stem/progenitors. Importantly, inhibition of AURKA in the organoid models caused a strong  
374 and specific depletion of the stem/progenitor pool that blocked growth of the entire  
375 heterogeneous population.

376

377 We also found that targeting self-renewal within the cancer stem cell population blocked tumor  
378 growth *in vivo*. A half dose regimen of alisertib, once-daily (see methods) instead of the twice-  
379 daily standard, reduced growth of the tumor by 50%. This low dose combined with castration  
380 resulted in 90% tumor growth inhibition consistent with the continued expression of AR-  
381 dependent target genes in the stem/progenitor cells. These data suggest that the clinical  
382 application of ARPI combined with alisertib may be useful for treating mCRPC displaying  
383 lineage plasticity.

384

385 Here we demonstrate the existence of a minor stem/progenitor subpopulation representing a  
386 singular vulnerability within the larger heterogeneous tumor cell population. These data suggest  
387 that potentially responsive tumors may be overlooked because key subpopulations are obscured  
388 in the heterogeneity of the tumor. Therefore, an effort to identify important minor populations, as  
389 we have shown here, may better inform treatment decisions by identifying responsive tumors  
390 that would otherwise appear to be poor candidates.

391

392

393

394

## 395 REFERENCES

396

397 Arora, V.K., Schenkein, E., Murali, R., Subudhi, S.K., Wongvipat, J., Balbas, M.D., Shah, N., Cai, L.,  
398 Efsthathiou, E., Logothetis, C., *et al.* (2013). Glucocorticoid receptor confers resistance to antiandrogens  
399 by bypassing androgen receptor blockade. *Cell* 155, 1309-1322.

400 Attard, G., Reid, A.H., Yap, T.A., Raynaud, F., Dowsett, M., Settatree, S., Barrett, M., Parker, C., Martins,  
401 V., Folkler, E., *et al.* (2008). Phase I clinical trial of a selective inhibitor of CYP17, abiraterone acetate,  
402 confirms that castration-resistant prostate cancer commonly remains hormone driven. *J Clin Oncol* 26,  
403 4563-4571.

404 Balanis, N.G., Sheu, K.M., Eserdebe, F.N., Patel, S.J., Smith, B.A., Park, J.W., Alhani, S., Gomperts, B.N.,  
405 Huang, J., Witte, O.N., *et al.* (2019). Pan-cancer Convergence to a Small-Cell Neuroendocrine Phenotype  
406 that Shares Susceptibilities with Hematological Malignancies. *Cancer Cell* 36, 17-34 e17.

407 Beltran, H., Prandi, D., Mosquera, J.M., Benelli, M., Puca, L., Cyrta, J., Marotz, C., Giannopoulou, E.,  
408 Chakravarthi, B.V., Varambally, S., *et al.* (2016). Divergent clonal evolution of castration-resistant  
409 neuroendocrine prostate cancer. *Nat Med* 22, 298-305.

410 Beshiri, M.L., Tice, C.M., Tran, C., Nguyen, H.M., Sowalsky, A.G., Agarwal, S., Jansson, K.H., Yang, Q.,  
411 McGowen, K.M., Yin, J., *et al.* (2018). A PDX/Organoid Biobank of Advanced Prostate Cancers Captures  
412 Genomic and Phenotypic Heterogeneity for Disease Modeling and Therapeutic Screening. *Clin Cancer*  
413 *Res* 24, 4332-4345.

414 Bidy, B.A., Kong, W., Kamimoto, K., Guo, C., Waye, S.E., Sun, T., and Morris, S.A. (2018). Single-cell  
415 mapping of lineage and identity in direct reprogramming. *Nature*.

416 Bluemn, E.G., Coleman, I.M., Lucas, J.M., Coleman, R.T., Hernandez-Lopez, S., Tharakan, R., Bianchi-Frias,  
417 D., Dumpit, R.F., Kaipainen, A., Corella, A.N., *et al.* (2017). Androgen Receptor Pathway-Independent  
418 Prostate Cancer Is Sustained through FGF Signaling. *Cancer Cell* 32, 474-489 e476.

419 Bolis, M., Bossi, D., Vallergera, A., Ceserani, V., Cavalli, M., Impellizzieri, D., Di Rito, L., Zoni, E., Mosole, S.,  
420 Elia, A.R., *et al.* (2021). Dynamic prostate cancer transcriptome analysis delineates the trajectory to  
421 disease progression. *Nat Commun* 12, 7033.

422 Buttigliero, C., Tucci, M., Bertaglia, V., Vignani, F., Bironzo, P., Di Maio, M., and Scagliotti, G.V. (2015).  
423 Understanding and overcoming the mechanisms of primary and acquired resistance to abiraterone and  
424 enzalutamide in castration resistant prostate cancer. *Cancer Treat Rev* 41, 884-892.

425 Cejas, P., Xie, Y., Font-Tello, A., Lim, K., Syamala, S., Qiu, X., Tewari, A.K., Shah, N., Nguyen, H.M., Patel,  
426 R.A., *et al.* (2021). Subtype heterogeneity and epigenetic convergence in neuroendocrine prostate  
427 cancer. *Nat Commun* 12, 5775.

428 Cros, J., Theou-Anton, N., Gounant, V., Nicolle, R., Reyes, C., Humez, S., Hescot, S., Thomas de  
429 Montpreville, V., Guyetant, S., Scoazec, J.Y., *et al.* (2021). Specific Genomic Alterations in High-Grade  
430 Pulmonary Neuroendocrine Tumours with Carcinoid Morphology. *Neuroendocrinology* 111, 158-169.

431 David M Glover, M.H.L., Doris A McLean, Huw Parry (1995). Mutations in aurora prevent centrosome  
432 separation leading to the formation of monopolar spindles. *Cell* 81, 95-105.

433 Davies, A., Nouruzi, S., Ganguli, D., Namekawa, T., Thaper, D., Linder, S., Karaoglanoglu, F., Omur, M.E.,  
434 Kim, S., Kobelev, M., *et al.* (2021). An androgen receptor switch underlies lineage infidelity in treatment-  
435 resistant prostate cancer. *Nat Cell Biol*.

436 Eterno, V., Zambelli, A., Villani, L., Tuscano, A., Manera, S., Spitaleri, A., Pavesi, L., and Amato, A. (2016).  
437 Aurka controls self-renewal of breast cancer-initiating cells promoting wnt3a stabilization through  
438 suppression of miR-128. *Scientific reports* 6, 28436.

439 Fennell, K.A., Vassiliadis, D., Lam, E.Y.N., Martelotto, L.G., Balic, J.J., Hollizeck, S., Weber, T.S., Semple, T.,  
440 Wang, Q., Miles, D.C., *et al.* (2021). Non-genetic determinants of malignant clonal fitness at single-cell  
441 resolution. *Nature*.

442 Gao, R., Bai, S., Henderson, Y.C., Lin, Y., Schalck, A., Yan, Y., Kumar, T., Hu, M., Sei, E., Davis, A., *et al.*  
443 (2021). Delineating copy number and clonal substructure in human tumors from single-cell  
444 transcriptomes. *Nat Biotechnol* 39, 599-608.

445 Huggins, C.a.H., C.V. (1972). Studies on prostatic cancer: I. The effect of castration, of estrogen and of  
446 androgen injection on serum phosphatases in metastatic carcinoma of the prostate. *CA: A Cancer*  
447 *Journal for Clinicians* 22, 232-240.

448 Hui Shi, T.T., Brian J. Abraham, Adam D. Durbin, Mark W. Zimmerman, Cigall Kadoch, A. Thomas Look  
449 (2020). ARID1A loss in neuroblastoma promotes the adrenergic-to-mesenchymal transition by regulating  
450 enhancer-mediated gene expression. *SCIENCE ADVANCES* 6, 1-12.

451 Jung, E.M., Moffat, J.J., Liu, J., Dravid, S.M., Gurumurthy, C.B., and Kim, W.Y. (2017). Arid1b  
452 haploinsufficiency disrupts cortical interneuron development and mouse behavior. *Nat Neurosci* 20,  
453 1694-1707.

454 La Manno, G., Soldatov, R., Zeisel, A., Braun, E., Hochgerner, H., Petukhov, V., Lidschreiber, K., Kastri, M.E., Lonnerberg, P., Furlan, A., *et al.* (2018). RNA velocity of single cells. *Nature* 560, 494-498.

456 Labrecque, M.P., Coleman, I.M., Brown, L.G., True, L.D., Kollath, L., Lakely, B., Nguyen, H.M., Yang, Y.C., da Costa, R.M.G., Kaipainen, A., *et al.* (2019). Molecular profiling stratifies diverse phenotypes of treatment-refractory metastatic castration-resistant prostate cancer. *J Clin Invest* 129, 4492-4505.

458 Marchio, C., Geyer, F.C., Ng, C.K., Piscuoglio, S., De Filippo, M.R., Cupo, M., Schultheis, A.M., Lim, R.S., Burke, K.A., Guerini-Rocco, E., *et al.* (2017). The genetic landscape of breast carcinomas with neuroendocrine differentiation. *J Pathol* 241, 405-419.

462 Perez Kerkvliet, C., Dwyer, A.R., Diep, C.H., Oakley, R.H., Liddle, C., Cidlowski, J.A., and Lange, C.A. (2020). Glucocorticoid receptors are required effectors of TGFbeta1-induced p38 MAPK signaling to advanced cancer phenotypes in triple-negative breast cancer. *Breast Cancer Res* 22, 39.

464 Ping Mu, Z.Z., Matteo Benelli, Wouter R. Karthaus, Elizabeth Hoover,, Chi-Chao Chen, J.W., Sheng-Yu Ku, Dong Gao, Zhen Cao,, Neel Shah, E.J.A., Wassim Abida, Philip A. Watson, Davide Prandi,, Chun-Hao Huang, E.d.S., Scott W. Lowe, Leigh Ellis,, Himisha Beltran, M.A.R., David W. Goodrich,, and Francesca Demichelis, C.L.S. (2017). SOX2 promotes lineage plasticity and antiandrogen resistance in TP53- and RB1-deficient prostate cancer. *Science* 355, 84-88.

470 Puccini, A., Poorman, K., Salem, M.E., Soldato, D., Seeber, A., Goldberg, R.M., Shields, A.F., Xiu, J., Battaglin, F., Berger, M.D., *et al.* (2020). Comprehensive Genomic Profiling of Gastroenteropancreatic Neuroendocrine Neoplasms (GEP-NENs). *Clin Cancer Res* 26, 5943-5951.

472 Quintanal-Villalonga, A., Chan, J.M., Yu, H.A., Pe'er, D., Sawyers, C.L., Sen, T., and Rudin, C.M. (2020). Lineage plasticity in cancer: a shared pathway of therapeutic resistance. *Nat Rev Clin Oncol* 17, 360-371.

474 Rahul Aggarwal, J.H., Joshi J. Alumkal, Li Zhang, Felix Y. Feng, George V. Thomas, Alana S. Weinstein,, Verena Friedl, C.Z., Owen N. Witte, Paul Lloyd, Martin Gleave, Christopher P. Evans, Jack Youngren,, Tomasz M. Beer, M.R., Christopher K. Wong, Lawrence True, Adam Foye, Denise Playdle, Charles J., Ryan, P.L., Kim N. Chi, Vlado Uzunangelov, Artem Sokolov, Yulia Newton, Himisha Beltran, Francesca, and Demichelis, M.A.R., Joshua M. Stuart, and Eric J. Small (2018). Clinical and Genomic Characterization of Treatment-Emergent Small-Cell Neuroendocrine Prostate Cancer: A Multi-institutional Prospective Study. *JOURNAL OF CLINICAL ONCOLOGY* 36, 2492-2503.

482 Scher, H.I., Beer, T.M., Higano, C.S., Anand, A., Taplin, M.-E., Efstathiou, E., Rathkopf, D., Shelkey, J., Yu, E.Y., Alumkal, J., *et al.* (2010). Antitumour activity of MDV3100 in castration-resistant prostate cancer: a phase 1–2 study. *The Lancet* 375, 1437-1446.

484 Scher, H.I., and Sawyers, C.L. (2005). Biology of progressive, castration-resistant prostate cancer: directed therapies targeting the androgen-receptor signaling axis. *J Clin Oncol* 23, 8253-8261.

486 Sharma, S.V., Lee, D.Y., Li, B., Quinlan, M.P., Takahashi, F., Maheswaran, S., McDermott, U., Azizian, N., Zou, L., Fischbach, M.A., *et al.* (2010). A chromatin-mediated reversible drug-tolerant state in cancer cell subpopulations. *Cell* 141, 69-80.

489 Sheng Yu Ku, S.R., Yanqing Wang, Ping Mu, Mukund Seshadri,, Zachary W. Goodrich, M.M.G., David P. Labbé,, Eduardo Cortes Gomez, J.W., Henry W. Long, Bo Xu, Myles Brown,, and Massimo Loda, C.L.S., Leigh Ellis, David W. Goodrich (2017). Rb1 and Trp53 cooperate to suppress prostate cancer lineage plasticity, metastasis, and antiandrogen resistance. *Science* 355, 78-83.

494 Taavitsainen, S., Engedal, N., Cao, S., Handle, F., Erickson, A., Prekovic, S., Wetterskog, D., Tolonen, T., Vuorinen, E.M., Kiviho, A., *et al.* (2021). Single-cell ATAC and RNA sequencing reveal pre-existing and persistent cells associated with prostate cancer relapse. *Nat Commun* 12, 5307.

496 Wang, Y.X., Feige, P., Brun, C.E., Hekmatnejad, B., Dumont, N.A., Renaud, J.M., Faulkes, S., Guindon, D.E., and Rudnicki, M.A. (2019). EGFR-Aurka Signaling Rescues Polarity and Regeneration Defects in Dystrophin-Deficient Muscle Stem Cells by Increasing Asymmetric Divisions. *Cell Stem Cell* 24, 419-432 e416.

501  
502  
503  
504  
505  
506  
507  
508  
509  
510  
511  
512  
513  
514  
515  
516  
517  
518  
519  
520  
521  
522  
523  
524  
525  
526  
527  
528  
529  
530  
531  
532  
533  
534  
535  
536  
537  
538  
539  
540  
541

## ACKNOWLEDGMENTS

The authors wish to express their gratitude to the patients and the families of the patients who contributed to this study. We would like to thank the LGCP Microscopy Core at the NCI/CCR and we would like to thank the CCR Single Cell Analysis Facility. Sequencing was performed with the CCR Genomics Core. This work utilized the computational resources of the NIH HPC Biowulf cluster (<http://hpc.nih.gov>). We would like to thank A. Zoubeidi for providing the EZH2 phospho-T350 antibody. We thank D. Takeda, G. Merlino, J. Shern, and M. Shen for reviewing the manuscript.

## FUNDING

This research was supported by the Intramural Research Program of the NIH, National Cancer Institute, Center for Cancer Research.  
Prostate Cancer Foundation (Young Investigator Awards to M.L.B. and A.G.S.)  
Department of Defense Prostate Cancer Research Program (W81XWH-16-1-0433 to A.G.S)  
Support from CCR Single Cell Analysis Facility was funded by FNLCR Contract HHSN261200800001E.

## AUTHOR CONTRIBUTIONS

Conceptualization: M.L.B., K.K.  
Methodology: M.L.B., S.A.M., S.A., F.H.K., W.L.D., K.K.  
Investigation: M.L.B., R.L., A.G.S., D.B., C.M.T., C.T., J.K., J.Y., A.N.A.  
Formal analysis: M.L.B., B.J.C., A.T.K., K.K., R.L., A.G.S., J.Y., T.L.L.  
Visualization: M.L.B., B.J.C., A.T.K.  
Project administration: M.L.B., K.K.  
Supervision: K.K.  
Writing: M.L.B., K.K.



## 542 MATERIALS AND METHODS

543

### 544 Histology

545 Formaldehyde-fixed tissue and organoid sections were embedded in paraffin blocks. Sections  
546 were cut, mounted on slides, and put through steps of graded alcohol deparaffinization. Steam  
547 antigen retrieval was performed for fifteen minutes (DAKO 1699) followed by washes in  
548 PBS/0.1% Tween-20 (PBST) 3x five minutes. Sections were blocked in Background Buster  
549 (Innovex NB306) for 40 minutes and then incubated overnight in primary antibody at 4°C. The  
550 next day the slides were washed three times with PBST and then incubated with a biotinylated  
551 secondary antibody for 30 minutes at room temperature. Antibody staining was developed with  
552 3, 3' diaminobenzidine (DAB) and counterstained with hematoxylin. Slides were imaged using a  
553 Zeiss Axioscan.Z1 microscope with a plan-apochromat 20x NA 0.8 objective.

554 ODX tumor sections were processed and imaged as described above. The sections were stained  
555 using an Intellipath FLX autostainer (Biocare Medical). Quantification of BrdU was done using  
556 the Indica Labs HALO v3.3 software running the CytoNuclear v2.0.9 algorithm. The optical  
557 density threshold for “weak” labeling was 0.377 “strong” was set at 1.331. Data was plotted  
558 using GraphPad Prism v8.

559 The IHC for the biopsy tissue sections was done in the NIH Clinical Center Pathology lab.

560

### 561 Organoid culture

562 Organoids were established and cultured according to our previously described methods and  
563 culture conditions (9). Patients provided informed consent, and samples were procured from the  
564 NIH Clinical Center under NIH Institutional Review Board approval in accordance with U.S.  
565 Common Rule. NCI-PC35-1, NCI-PC35-2, and LuCaP 145.2 organoids were grown in PrEN -  
566 p38i/-NAC media conditions. NCI-PC44 organoids were grown in PrEN -p38.

567

### 568 DNA extraction

569 DNA was extracted from the primary prostate tumor. Sections at 5 µM thick from the paraffin  
570 block of radical prostatectomy tissue were cut onto slides but not mounted and then stained with  
571 H&E. Tumor tissue from five sections was macrodissected and combined into one tube.  
572 Adjacent normal prostate tissue from 19 unmounted sections was combined into another tube.  
573 DNA was extracted using the QIAmp DNA FFPE Tissue Kit (Qiagen 56404). The protocol was  
574 modified to include the following steps: (1) Incubated overnight with shaking in Buffer ATL  
575 with proteinase K. (2) An additional wash step with 80% ethanol prior to elution. (3) The Qiagen  
576 ATE buffer was replaced with Low TE buffer (Applied Biosystems 4389764), pre-heated to  
577 55°C and applied to the column for ten minutes. The DNA was quantified with Quant-iT  
578 Picogreen (Invitrogen P11495).

579

580 DNA was extracted from NCI-PC35-1 and NCI-PC35-2 organoids using an AllPrep DNA/RNA  
581 Mini Kit (Qiagen 80204) according to the manufacturer’s protocol for animal cells. Qiashredder  
582 columns (Qiagen 79656) were used for the homogenization step.

583

### 584 DNA whole-genome sequencing

585 1 µg of genomic DNA was fragmented (Covaris), end-repaired, and assembled into paired-end  
586 libraries using the Illumina TruSeq DNA Library Preparation Kit. Libraries were sequenced with  
587 150 cycles paired-end (2 × 150) on an Illumina HiSeq 4000. Per-lane FASTQ pairs were

588 trimmed using Trimmomatic version 0.39 and aligned to hg19 using BWA-MEM version 0.7.17.  
589 PCR duplicates were marked using the SPARK implementation of GATK MarkDuplicates  
590 version 4.1.4.1 with PICARD SetNmMdAndUqTags. Base quality score recalibration was  
591 performed using the SPARK implementation of GATK BQSRPipeline. Lane-level BAM files  
592 were merged using PICARD MergeSamFiles and GATK MarkDuplicates was run a second time  
593 with PICARD SetNmMdAndUqTags. A normal saliva sample was sequenced to a mean depth of  
594  $32.8\times$  coverage. The tumor samples were sequenced to a mean depth of  $54.5\times$  coverage (range:  
595  $40.4\times$  to  $78.6\times$ ).

596

### 597 **Somatic mutation calling**

598 MuTect2 in GATK 4.1.3.0 was used in single-sample mode to generate VCF files for each  
599 normal BAM with the disable-read-filter set to MateOnSameContigOrNoMappedMateReadFilter  
600 and max-mnp-distance set to 0. A panel-of-normals was generated using GATK  
601 GenomicsDBImport with merge-input-intervals set to true and GATK  
602 CreateSomaticPanelOfNormals. MuTect2 was next run in paired mode with each tumor sample  
603 BAM matched to its benign normal BAM from the same type of sample (FFPE or fresh) and run  
604 with the panel-of-normals (pon), filtering in real-time against mutations observed in gnomAD,  
605 and with disable-read-filter set to MateOnSameContigOrNoMappedMateReadFilter. GATK  
606 GetPileupSummaries (filtering on ExAC sites) and GATK CalculateContamination were used on  
607 each tumor BAM for filtering raw MuTect2 calls using GATK FilterMutectCalls. Finally, 8-  
608 OxoG and FFPE filtering was performed, first using GATK CollectSequencingArtifactMetrics  
609 on each tumor BAM and passing its output GATK FilterByOrientationBias with artifact-modes  
610 set to G/T and C/T. Mutations were annotated using Oncotator.

611

### 612 **Somatic copy number alteration calling**

613 A joint set of copy number alterations and their clonal prevalence was determined using both  
614 GATK 4.1.3.0 and TitanCNA version 1.23.1 from whole-genome sequencing data. Using  
615 GATK, denoising was performed separately for FFPE and fresh tissues, first applying GATK  
616 CollectReadCounts for each tumor and normal BAM, and assembling a panel of normals using  
617 CreateReadCountPanelOfNormals. GATK DenoiseReadCounts was run on each tumor or  
618 normal sample using the appropriate panel of normals. GATK CollectAllelicCounts was run on  
619 each sample BAM for high-confidence 1000 Genomes Phase 1 SNP sites. Segmented copy  
620 number ratios were then calculated by using GATK ModelSegments, using denoised copy ratios  
621 for both matched tumor and normal as well as the allelic counts for each tumor sample. GATK  
622 CallCopyRatioSegments identified each region of gain or loss, per sample. TitanCNA was run  
623 using R version 3.6 on chromosomes 1-22 and X with 10kb intervals.

624

### 625 **Tumor phylogenetic analysis**

626 Phylogenetic tree estimation was performed using PhyloWGS version 1.0. Prior to tree  
627 evolution, mutations input was optimized as follows: 1) MuTect2 output multi-sample VCF files  
628 were filtered to tumor-only; 2) A floating depth cutoff was applied so that mutations in a single  
629 sample must be greater than 70% of the average depth of that sample from the same patient; 3) A  
630 hard filter of 90% strand bias was imposed; 4) A combined list of all mutations for all samples  
631 from each individual were compiled with a hard filter at 10% variant allele fraction (VAF);  
632 mutations less than 10% VAF were recovered from other samples provided they were  $>10\%$   
633 VAF in at least one sample. Copy number input was optimized as follows: 1) 1-bp segments

634 were removed from the joint output of TitanCNA and GATK; 2) high-level amplification and  
635 deep deletion events filtered from TitanCNA but present in output from the ichorCNA module  
636 were reintegrated into the .SEG file output when overlapping with GATK calls. PhyloWGS  
637 inputs per-patient were prepared using the create\_phylowgs\_inputs script joining each individual  
638 VCF (vardict) and CNV sample into a single set of SSM and CNV data. The corresponding  
639 SSM, CNV and parameters JSON files were then run using the multievolve script for parallel  
640 tree generation across 40 chains, using 1000 burn-in Markov chain Monte Carlo (MCMC)  
641 samples and 2500 fit MCMC iterations for a total of 100,000 potential tree structures. After tree  
642 generation, mutation and tree JSON files from the write\_results script were parsed to select the  
643 tree with the lowest (most negative) log likelihood score. The best scoring tree was pruned to  
644 conservatively decrease the number of major subclones. If any given node did not have at least 5  
645 SNVs or SSMs assigned to it, it was merged with its sibling node with the greatest number of  
646 events. If that node had no siblings, it was merged with its most immediate ancestral node, unless  
647 it was a direct descendent of the germ/normal node with no descendants, in which case it was  
648 eliminated. The subclonal composition of each node was determined by the average clonal  
649 prevalence of SSMs/CNVs assigned to each node and their relative proportion in each sequenced  
650 tumor sample.

651

652

### 653 **Immunoblots**

654  $5 \times 10^5$  cells from dissociated organoids were lysed in lysis buffer (50 mM Tris (pH 8) + EDTA  
655 (10 mM) + 1% SDS) with protease and phosphatase inhibitors. Protein concentration was  
656 determined using a BCA assay (Pierce 23227). 10  $\mu$ g of protein was loaded onto 4-20%  
657 Mini\_PROTEAN TGX gels (Bio-Rad 456-1094) or 4-20% Mini\_PROTEAN TGX Stain-Free  
658 gels (Bio-Rad 4568091). Semi-dry transfer was done with a Bio-RadTrans Blot Turbo apparatus  
659 for 30 minutes using Trans-Blot Turbo 5x Transfer Buffer (Bio-Rad10026938) except for  
660 ARID1A and ARID1B overnight - wet transfers were done. Membranes were blocked for 1 hour  
661 in 5% BSA. Overnight incubations with the primary antibodies were done at 4°C while rocking.  
662 Secondary antibody incubations were done for one hour at room temperature while rocking.  
663 Blots were developed with Clarity Western ECL Substrate (Bio-Rad 170-5061) and visualized  
664 on a Bio-Rad ChemiDoc Touch Imaging System.

665

### 666 **Immunofluorescent staining**

667 Organoids were dissociated and re-plated in 2D on 16-well chamber slides (Nunc 178599)  
668 coated with 75  $\mu$ g/ml poly-D-lysine (Millipore A-003-E) followed by 3% Matrigel (Corning  
669 356231). Cells were fixed for 10 minutes in 4% formaldehyde, then rinsed three times with PBS.  
670 Cells were permeabilized and blocked for one hour in PBS/5% goat serum/0.3% Triton-X 100.  
671 The cells were then incubated in primary antibody diluted in PBS/0.5% BSA overnight at 4°C.  
672 The cells were then washed 5x fifteen minutes at room temperature in PBST and incubated with  
673 fluorochrome-conjugate secondary antibody for one hour, followed by 5x fifteen-minute washes.  
674 Coverslips were mounted with Fluoro-Gel II + DAPI (Electron Microscopy Sciences 17985-50).  
675 Slides were imaged using a Zeiss Axioscan.Z1 microscope with a plan-apochromat 20x NA 0.8  
676 objective and a Colibri 7 LED light source. Quantification of IF images was done using the  
677 Indica Labs HALO v3.3 software running the CytoNuclear FL v2.0.12 algorithm.

678

### 679 **Proliferation assays**

680 Organoids were dissociated then replated in 3D in 96 well plates. Each time-point was plated in  
681 five well replicates and incubated overnight. All time-points were then quantified at the indicated  
682 day with CellTiter Glo 3D (Promega G9682) and luminescence was measured using a Tecan  
683 infinite M200 Pro plate reader. The average fold change for each time-point relative to day-0 was  
684 calculated. Three independent experiments were performed.

685

#### 686 **EdU-incorporation assays**

687 Twenty-four-hour pulse: organoids were dissociated then replated in 3D overnight. The next  
688 morning 10  $\mu$ M EdU (Invitrogen C10338) was added to the cultures for 24 hours. The organoids  
689 were then either immediately collected and replated in 2D for staining and imaging or they were  
690 maintained in culture for a chase period and collected at the appropriate time-point. EdU staining  
691 was performed according to the manufacturers protocol for most assays except the combination  
692 EdU/RNA-FISH assays where the following modifications were made: 1) BSA was not used in  
693 the wash buffers. 2) The incubation time in the Click-iT reaction cocktail was reduced to five  
694 minutes. Imaging was performed as describe above for immunofluorescence. Quantification of  
695 EdU was done using the Indica Labs HALO v3.3 software running either the CytoNuclear FL  
696 v2.0.12 algorithm or FISH-IF v1.2.2 algorithm. Cells were counted as EdU-positive above a  
697 minimum fluorescence value of 2,000.

698

699 Long-term incorporation assays: organoids were dissociated then replated in 3D overnight.  
700 Culture media containing 10  $\mu$ M EdU was added and replaced every twenty-four hours until the  
701 organoids were collected at the appropriate time-points.

702

#### 703 **PCA plot of AR v NE score WCM cohort**

704 Raw FASTQ files were accessed from dbGaP phs000909.v.p1 and reanalyzed using the nextflow  
705 core RNA seq pipeline v1.0. Following the methods described in Beltran et al. (2), a reference  
706 AR sample was generated by using the gene expression values for genes in the AR signature  
707 from a series of three LNCaP samples sequenced at NCI/CCR. A reference neuroendocrine  
708 sample was generated by averaging the expression of neuroendocrine genes across the  
709 neuroendocrine samples from the Weill Cornell Medicine (WCM) cohort. The AR score was  
710 defined as the correlation of the expression of the sample with the AR reference sample. The  
711 integrated NEPC score is defined as the correlation between the sample and the reference  
712 neuroendocrine sample.

713

#### 714 **scRNA-seq**

715 Organoids growing in 3D in Matrigel and culture media in a 12-well plate were collected from  
716 the Matrigel by adding 1 mg/ml Dispase (Gibco 17105-041) to the culture for two hours and  
717 transferred to Eppendorf tubes. The organoids were pelleted by centrifuge and dissociated in 100  
718  $\mu$ l of TrypLE (Gibco 12605-028) + 100  $\mu$ g/ml of DNase-I (Sigma Aldrich DN25) for 20  
719 minutes at 37°C with mechanical agitation every five minutes by pipette, using low retention  
720 tips. One ml of Advanced DMEM/F12 (Invitrogen 12634-02898) + 10  $\mu$ M Y-27632 ROCK  
721 inhibitor (Stemcell Technologies 72307) was added to neutralize the TrypLE. The cells were  
722 then passed through a 30  $\mu$ M cell strainer (Miltenyi Biotec 130-098-458) and assessed for  
723 viability and doublets before being pelleted and washed 3x in buffer (PBS + 0.04% BSA + Y-  
724 27632 (10  $\mu$ M)). The cells were then counted and loaded onto the 10x Genomics Chromium  
725 platform using the 3' v3.0 gene expression chemistry. Preparation of libraries were performed



726 according to vendor recommendations. Single cell libraries were sequenced on either an Illumina  
727 NextSeq 500/550 instrument or an Illumina NextSeq 2000 instrument. Data was processed using  
728 the 10x Genomics cellranger pipeline to demultiplex reads and then align those reads to the  
729 GRCh38 reference genome. Gene barcode matrices were generated using the cellranger pipeline  
730 from 10x Genomics aligned against grch38. An in-house single cell processing pipeline was used  
731 to standardize analysis across all samples which follows the methodology laid out in the  
732 Bioconductor single cell analysis book. Gene barcode matrices were read into R and doublets  
733 were detected and removed using scDblFinder. Additional quality control was applied using the  
734 scran and scatter packages, using the addPerCellQC function and filtering out cells that were  
735 identified as outliers using the isOutlier function for mitochondrial gene content, lower number  
736 of reads, and lower number of detected genes. Initial dimensional reduction was performed using  
737 GLMPCA from the scry package on all genes in the experiment. UMAPs were generated from  
738 three independent experiments for PC35-1 and PC35-2 and two experiments for LuCaP 145.2.  
739 Mutual nearest neighbor correction was performed to correct for batch effects on the principal  
740 components, and the corrected top 30 principal components were used to generate the UMAP.  
741 For PC44, UMAP was performed on the top 30 principal components from one experiment.  
742 Monocle3's graph-based clustering using leiden community detection with a q value cutoff of  
743 0.05 was used to identify clusters and larger partitions. Marker gene detection was performed  
744 using the score markers function from scater. Cell cycle state was inferred using cyclone.

745

#### 746 **scRNA-seq signature scores**

747 Signature scores for individual cells were generated by running PCA on batch corrected and  
748 normalized expression values from all single cell RNA sequencing samples using only the genes  
749 in published signatures. The AR and neuroendocrine signatures were created using the Beltran et  
750 al. (2) signatures, and the proliferation signature was generated using the gene list from Balanis  
751 et al. (5). The signature value is the loading for a particular cell from the first principal  
752 component.

753

#### 754 **RNA velocity**

755 RNA velocity was calculated independently on each sample using the default settings in  
756 velocity. RNA velocity vectors were generated using batch corrected principal components to  
757 embed on the UMAP.

758

#### 759 **CellTag analysis**

760 Organoids were collected and dissociated to single cells for transduction with a lentiviral library  
761 of CellTags. The CellTag library (CTL) was prepared according to Bidy et al. (13). Lentivirus  
762 was made by transfecting Lenti-X 293T cells (Clontech 632180) with CTL plasmids plus  
763 psPAX2 and VSV-G packaging plasmids using Lipofectamine 2000 (Invitrogen 11668019). The  
764 transfection mix was applied to the cells for six hours then removed and replaced with lentiviral  
765 collection media: DMEM + 10% FBS(HyClone) + 1.1% BSA + HEPES (10 mM) + sodium  
766 pyruvate (10 mM) + Primocin (Invivogen ant-pm-1). The lentivirus was collected in two batches  
767 at 48 and 72 hours and pooled together, then spun for 5 minutes at 1000 x g to pellet debris. The  
768 supernatant was then passed through a 0.45  $\mu$ M PES membrane filter. The lentivirus was  
769 concentrated 100-fold by ultracentrifuge: four hours at 4°C at 20,000 x g with low acceleration  
770 and then resuspended in PBS, aliquoted and stored at -80°C. For transduction,  $5 \times 10^5$  cells were  
771 combined with 3.5  $\mu$ l of lentivirus and 2  $\mu$ l of LentiBOOST (Sirion Biotech) in 2 ml of culture

772 media. The cells/lentivirus were transferred to one well of a 6-well plate coated with 3%  
773 Matrigel and centrifuged at 1,000 x g, low acceleration, for 90 minutes at 32°C. The plate was  
774 then incubated overnight at 37°C. The next morning the cells were detached from the plate with  
775 TrypLE, collected and counted, then re-plated in 3D in multiple wells of a 24-well plate at  
776 different concentrations ranging from  $5 \times 10^3$  –  $1 \times 10^5$  in order to maximize recovery of the  
777 targeted 10,000 - 15,000 cells desired for loading onto the 10x Genomics platform. The cells  
778 were kept in culture for four weeks, changing the media twice/week. Each well of organoids was  
779 then collected and processed as described above in the “scRNA-seq” paragraph of this methods  
780 section. After counting, we determined that  $5 \times 10^4$  cells/well yielded the ideal 15,000 cells after  
781 processing. 15,000 single cells were loaded onto the 10x Genomics Chromium platform as  
782 described above. Single cell libraries were sequenced as described above. Raw single cell  
783 FASTQs were aligned to a custom reference including the EGFP construct used in the vector for  
784 the cell tags (13). Reads were filtered to include only sequences that aligned to EGFP. The  
785 CellTagR package was used with barcode correction relying on starcode to call clones. Cells  
786 were considered clones if they shared at least two celltags and their jaccard similarity exceeded  
787 0.7 as specified in the documentation. To project clones onto UMAP embeddings, segments were  
788 drawn between cells that were called clones.

789

## 790 **RNA-FISH**

791 Organoids were dissociated and 75,000 cells were replated overnight in 2D on 12 mm round #1  
792 coverglass (Electron Microscopy Sciences 72231-01) coated with 75 µg/ml Poly-D-lysine  
793 followed by 3% Matrigel. The cells were washed in PBS, fixed in 4% formaldehyde for 10  
794 minutes at room temperature, and finally washed twice in PBS. The cells were permeabilized in  
795 70% ethanol for at least one hour at 4°C, the ethanol was removed, and Wash Buffer A  
796 (Biosearch Technologies SMF-WA1-60) was added and incubated at room temperature for five  
797 minutes. For staining, the Stellaris RNA-FISH probes, diluted in Hybridization Buffer  
798 (Biosearch Technologies SMF-HB1-10) plus 10% Deionized Formamide (Millipore 4610), were  
799 added to the cells and incubated overnight in a humidified chamber at 37°C. The cells were  
800 washed in Wash Buffer A for 30 minutes at 37°C in the dark, then counter-stained with 5 ng/ml  
801 DAPI diluted in Wash Buffer A in the dark at 37°C for 30 minutes. The cells were washed in  
802 Wash Buffer B (Biosearch Technologies SMF-WB1-20) for 5 minutes at room temperature in  
803 the dark, the cover glass was mounted onto a slide with ProLong Gold antifade reagent  
804 (Invitrogen P36934), allowed to dry and stored at -20°C in the dark. For RNA-FISH/EdU and  
805 RNA-FISH/IF combined assays, the RNA-FISH hybridization was done first up to/including the  
806 Wash Buffer B step. The cells were rinsed twice in PBS and stained for EdU or stained with  
807 antibodies for IF. For EdU incorporation/staining, see the above methods section for details. For  
808 IF, the blocking step was excluded, and antibodies were diluted in PBS. Imaging was done with  
809 a Nikon Ti2 microscope equipped with a CFI Plan-Apochromat 60x NA 1.4 oil immersion  
810 objective, Lumencor Sola SE 365 FISH light engine, and Photometrics Prime BSI sCMOS  
811 camera. A maximum intensity projection was created from a 3.6 µM 13 step Z stack for each  
812 field of view. Quantification of RNA-FISH and combined assay images was done using Indica  
813 Labs HALO v3.3 software running the FISH-IF v1.2.2 algorithm. For RNA-FISH scatter plots,  
814 total FISH counts were plotted. For the RNA-FISH/IF combined assays, total FISH counts were  
815 plotted against raw IF intensity values. For the RNA-FISH/EdU drug-treated assays, a minimum  
816 threshold of five spots (transcripts) per cell was set to call a cell positive for a given FISH  
817 marker. Cells were counted as EdU-positive above a minimum fluorescence value of 2,000. The

818 EZH2 probe set was ordered from the Stellaris Design Ready Probe Sets (Biosearch  
819 Technologies VSMF-2123-5). All other RNA-FISH probe sets were custom designed using the  
820 Stellaris Probe Designer tool at the biosearchtech.com website, and QC'd for specificity using  
821 the UCSC genome browser BLAT function. The custom designed RNA-FISH probe-set  
822 sequence information is in Table S1.

823

### 824 **CopyKAT**

825 Copy number variation was computed using CopyKat (14) with default setting and *cell.line*  
826 mode enabled. Briefly, raw counts from scRNAseq experiments were used as input to CopyKat.  
827 CopyKat clusters were generated by unsupervised hierarchical clustering of the CNV results  
828 using the function *hclust* with ward.D linkage function on the cell distance matrix computed  
829 using the *dist* function calculated with “euclidean” method. Copykat clusters were assigned  
830 based on the number of UMAP clusters using *cutree* function.

831

### 832 **scATAC-seq**

833 Organoids were collected and dissociated as described above in the “scRNA-seq” paragraph of  
834 this methods section. Single cell suspensions of  $2.5 \times 10^5$  cells were spun down and resuspended  
835 in 100  $\mu$ l of cold ATAC lysis buffer (10 mM Tris(pH 7.4) + 10 mM NaCl + 3 mM MgCl<sub>2</sub> + 1%  
836 BSA + 0.1% Tween-20), pipetted up/down 10x, incubated on ice for five minutes, and finally  
837 pipetted an additional 5x before adding 1 ml of ATAC Wash Buffer (10 mM Tris(pH 7.4) + 10  
838 mM NaCl + 3 mM MgCl<sub>2</sub> + 1% BSA + 0.1% Tween-20 + 0.1% NP40 + 0.01% digitonin). The  
839 cells were then pelleted at 500 x g for 5 minutes at 4°C. All of the wash buffer was removed, and  
840 the nuclei were resuspended in 50  $\mu$ l of Nuclei Buffer (10x Genomics PN-2000153/2000207).  
841 Single nuclei suspensions were transposed before being partitioned on the 10x Genomics  
842 Chromium platform using the Single Cell ATAC v1.1 chemistry (10x Genomics). Preparation of  
843 libraries were performed according to vendor recommendations.  
844 Single cell atac sequencing was processed using the cellranger scatac pipeline from 10x  
845 Genomics. Additional analysis was performed using the ArchR library using 250,000 features for  
846 the latent semantic indexing. Inferred transcription factor activity was generated using the  
847 method included in ArchR for generating ChromVAR deviations Z scores. The score markers  
848 function was applied and performs a competitive ranking of features using three statistical tests,  
849 Welch's t test, Wilcoxon rank sum test, and a binominal test. Features that were ranked highly in  
850 all three tests were considered.

851

### 852 **Dose-response assays**

853 Organoids were dissociated then replated in 3D at 3,000 cells/well in 384 well plates. Drugs  
854 were prepared by two-fold serial dilutions starting at 10  $\mu$ M and spanning 11 concentrations,  
855 plus an additional vehicle control. All treatments were done in replicates of five. The cells were  
856 treated twice per week for two weeks, then quantified with CellTiter Glo 3D and luminescence  
857 was measured using a Tecan infinite M200 Pro plate reader. Data is shown as an average of three  
858 independent experiments.

859

### 860 **Xenograft tumor study**

861 The animal study was performed according to the protocol approved by the NCI-Bethesda  
862 Animal Care and Use Committee. The organoid-derived xenograft (ODX) model was established  
863 initially from NCI-PC35-1 organoids subcutaneously injected in NOD scid gamma (NSG) mice,

864 and subsequently maintained by serial passage of tumor fragments in NSG mice. For the  
865 experiment, 2 mm tumor fragments were implanted subcutaneously in NSG mice. When the  
866 tumors reached an average size of 0.3 cm<sup>3</sup> the mice were randomized into four treatment groups  
867 of five mice/group. Mice in the castrated groups were castrated by orchietomy concurrent with  
868 the start of drug treatment. Mice were drugged once daily, five days/week by oral gavage with 30  
869 mg/kg of alisertib suspended in vehicle (10% 2-hydroxypropyl- $\beta$ -cyclodextrin, 1% sodium  
870 bicarbonate in water). Mice in the vehicle control group were treated on the same schedule.  
871 Tumor volumes were measured twice/week. The study was terminated after nine weeks when the  
872 control group reached the maximum allowable burden of 2 cm<sup>3</sup>. Tumors were harvested and  
873 fixed in 4% formaldehyde overnight then transferred to 70% ethanol.

874

#### 875 **Antibodies**

| Target            | Company                  | Catalog number | Assay      |
|-------------------|--------------------------|----------------|------------|
| AR                | Abcam                    | ab133273       | IF/Western |
| AR                | Cell Signaling           | 5153           | IHC        |
| ARID1A            | Cell Signaling           | 12354          | Western    |
| ARID1B            | Abcam                    | ab57461        | Western    |
| BrdU              | Abcam                    | ab6326         | IHC        |
| CHGA              | Invitrogen               | MA5-13096      | IF/IHC     |
| EZH2              | Cell Signaling           | 5246           | Western    |
| EZH2 phospho-S21  | Bethyl Laboratories      | IHC-00388      | Western    |
| EZH2 phospho-T345 | Active Motif             | 61242          | Western    |
| EZH2 phospho-T350 | Gift from Amina Zoubeydi | NA             | Western    |
| p27               | BD Biosciences           | 610241         | Western    |
| p53               | Cell Signaling           | 2524           | Western    |
| PTEN              | Cell Signaling           | 9188           | Western    |
| RB                | Cell Signaling           | 9309           | Western    |
| SYP               | Agilent                  | M731529-2      | IHC        |

876

#### 877 **Data availability**

878 The sequence information for all RNA-FISH probe sets is located in Supplementary Information  
879 Table 1. The WGS, scRNA-seq, and scATAC-seq data have been deposited in ###.



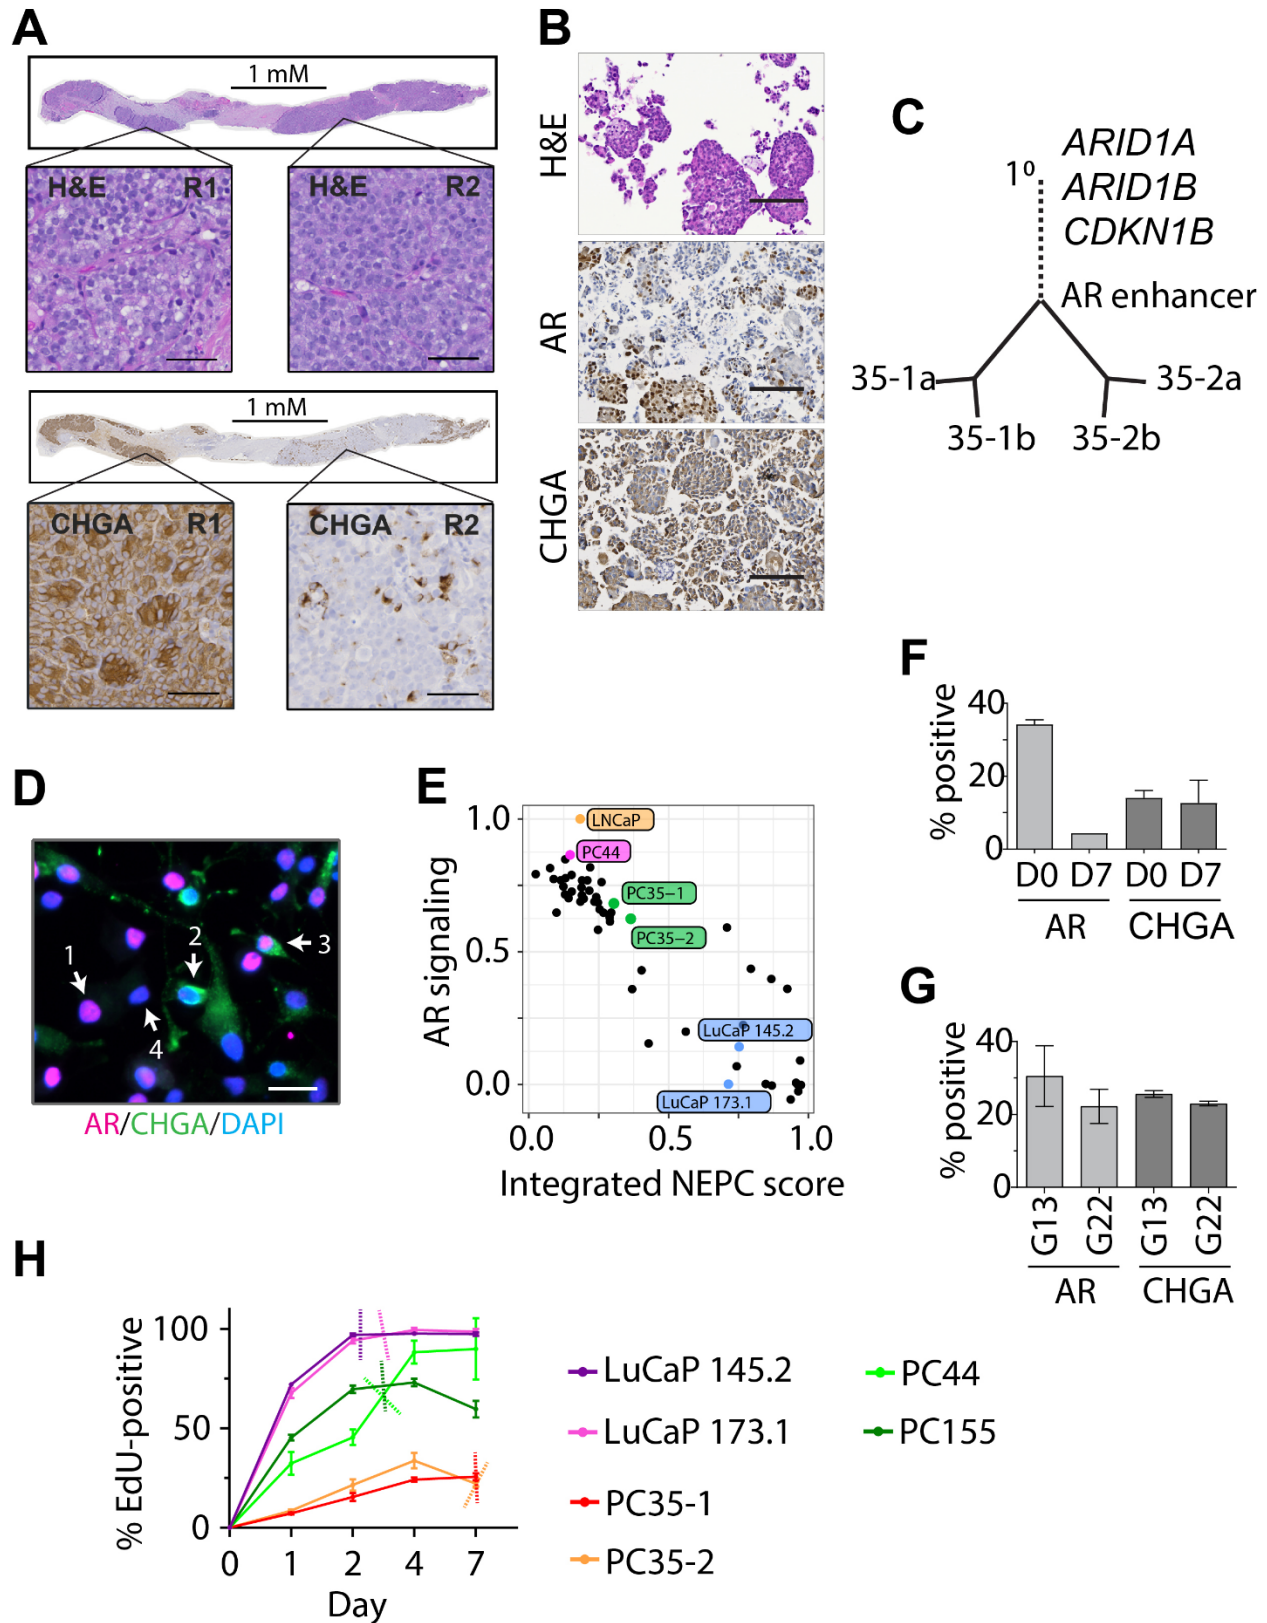

**Figure 1. Patient-derived organoid models of mCRPC capture and maintain genetic and phenotypic heterogeneity** (A) Serial sections of tumor biopsy tissue stained with hematoxylin and eosin (H&E) or the indicated antibodies. Magnified views of Region-1 (R1) and Region-2 (R2) are shown. Scale bars, 50  $\mu$ M. (B) Patient biopsy derived organoid sections stained with H&E or the indicated antibodies. Scale bars, 200  $\mu$ M. (C) Phylogenetic tree of primary tumor and metastasis derived organoids. Primary prostate tumor, 1<sup>o</sup>. PC35-1 subclones - 35-1a, 35-1b. PC35-2 subclones - 35-2a, 35-2b. Significant genetic events indicated at positions in the tree where they originated. (D) PC35-1 organoids were dissociated to single cells and stained by immunofluorescence (IF) with antibodies against the indicated proteins and DAPI. Each of four phenotypes is indicated by a number and arrow. 1 = AR<sup>POS</sup>/CHGA<sup>Lo/NEG</sup>; 2 = AR<sup>NEG</sup>/CHGA<sup>Hi</sup>; 3 = AR<sup>POS</sup>/CHGA<sup>Hi</sup>; 4 = AR<sup>NEG</sup>/CHGA<sup>Lo/NEG</sup>. (E) The Weill Cornell Medicine cohort of mCRPC (black filled circles) and the indicated organoid models or cell line are plotted by AR signaling score and NEPC score. (F) IF combined with 5-ethynyl-2'-deoxyuridine (EdU) pulse-chase assay of PC35-2. Organoids were pulsed with EdU (10 $\mu$ M) for 24 hours (D0) and chased for seven days (D7). The organoids were dissociated and quantified as single cells and plotted as percent-positive of total cells. (G) IF staining of CT35-1 organoids with antibodies against the indicated proteins. Generation 13 and 22 organoids were dissociated and quantified as single cells then plotted as percent-positive of total cells. (H) Continuous EdU-incorporation assay for the indicated organoid lines. The graph shows the percentage of EdU-positive cells of the over time. Dashed lines mark the approximate day of population doubling for each. Bar and line graphs are plotted as the mean of three independent experiments. Error bars represent  $\pm$  standard error of the mean (SEM).

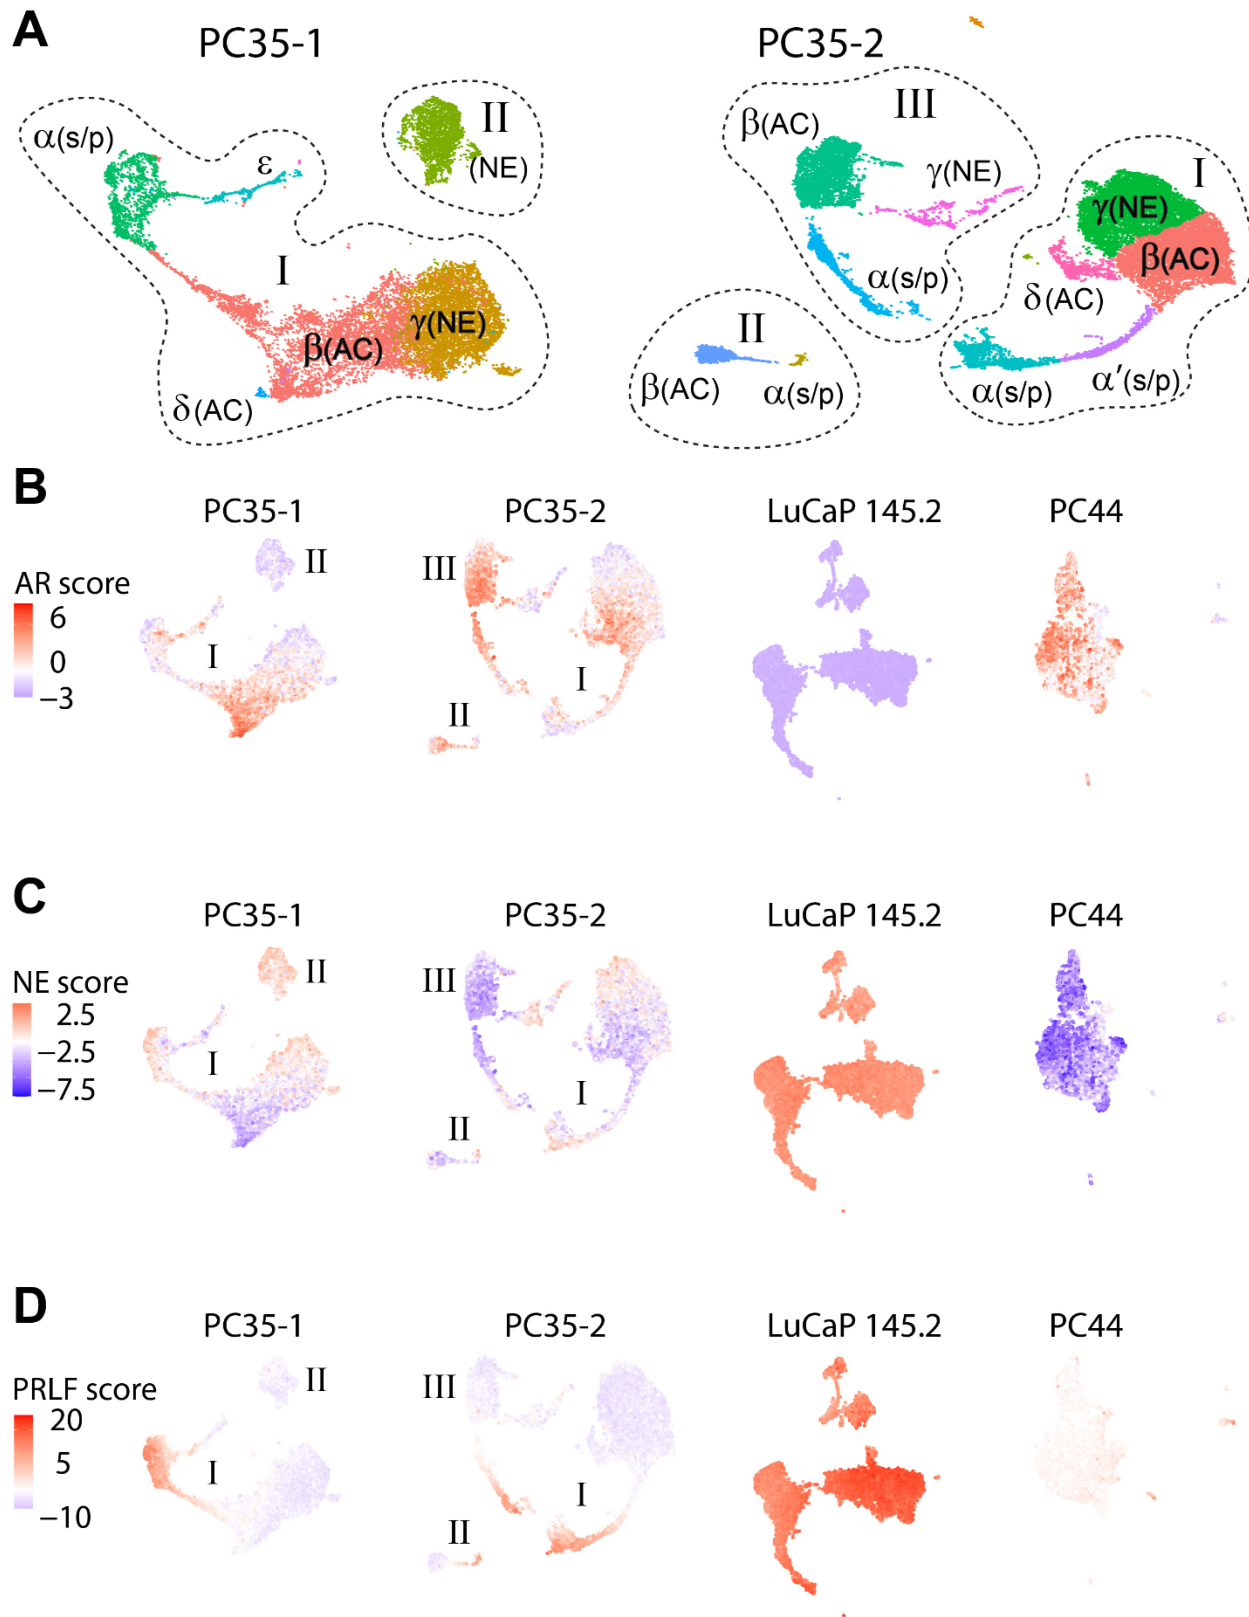

**Figure 2. Single-cell transcriptomics identifies lineage-distinct heterogeneity in the PC35**

**organoid models** (A) scRNA-seq transcriptomic profiles of PC35-1 and PC35-2 organoids

plotted as UMAPs. Major clusters are circled and labeled with roman numerals (I, II, III).

Subclusters are colored and annotated with Greek letters ( $\alpha - \epsilon$ ) and phenotype designations:

stem/progenitor (s/p), adenocarcinoma-like (AC), or neuroendocrine-like (NE). (B) AR and (C)

neuroendocrine signature scores for each cell determined by principal component analysis (PCA)

using published gene sets from Beltran et al. Loadings from the first principal component for

each cell are projected onto the UMAPs from (A) and UMAPs plotted for LuCaP 145.2 and

PC44 scRNA-seq transcriptomic data. (D) Proliferation score determined as in (B) and (C). The

proliferation gene set was derived from Balanis et al.



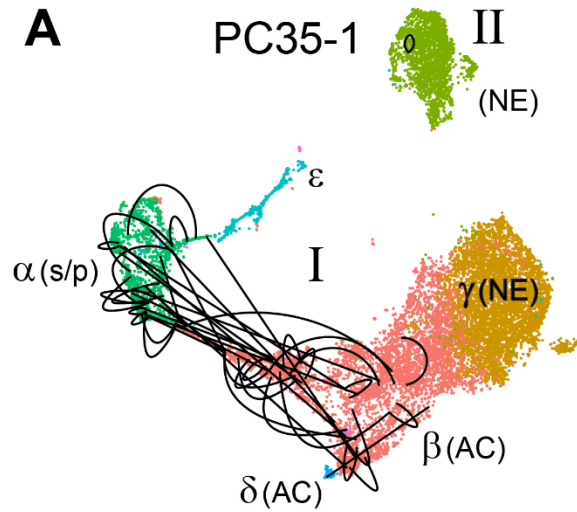

| Major cluster | Subcluster | Number of cells/subcluster | Number of CellTag clones | Percent CellTag clones |
|---------------|------------|----------------------------|--------------------------|------------------------|
| I             | $\alpha$   | 826                        | 35                       | <b>4.2</b>             |
|               | $\beta$    | 1803                       | 47                       | 2.6                    |
|               | $\gamma$   | 1566                       | 0                        | 0.0                    |
|               | $\delta$   | 22                         | 1                        | 4.5                    |
|               | $\epsilon$ | 361                        | 0                        | 0.0                    |
| II            | —          | 625                        | 2                        | 0.3                    |

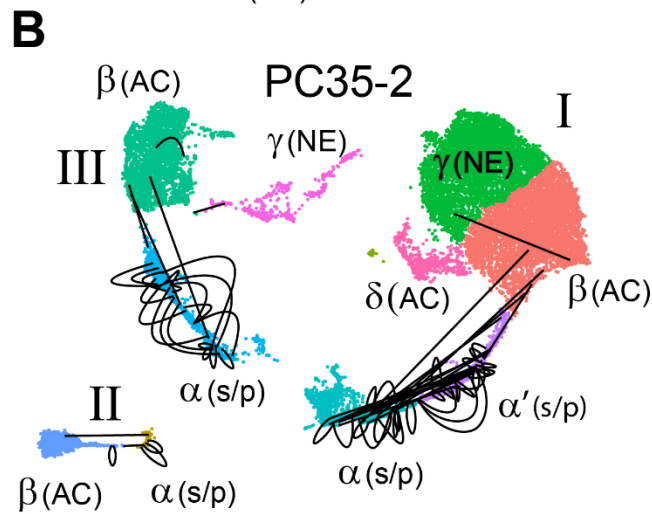

| Major cluster | Subcluster | Number of cells/subcluster | Number of CellTag clones | Percent CellTag clones |
|---------------|------------|----------------------------|--------------------------|------------------------|
| I             | $\alpha$   | 729                        | 36                       | <b>4.9</b>             |
|               | $\alpha'$  | 298                        | 41                       | <b>13.8</b>            |
|               | $\beta$    | 1472                       | 6                        | 0.4                    |
|               | $\gamma$   | 2173                       | 1                        | 0.05                   |
|               | $\delta$   | 235                        | 0                        | 0.0                    |
| II            | $\alpha$   | 57                         | 5                        | <b>8.8</b>             |
|               | $\beta$    | 334                        | 4                        | 1.2                    |
| III           | $\alpha$   | 571                        | 41                       | <b>7.2</b>             |
|               | $\beta$    | 1099                       | 7                        | 0.6                    |
|               | $\gamma$   | 312                        | 1                        | 0.3                    |

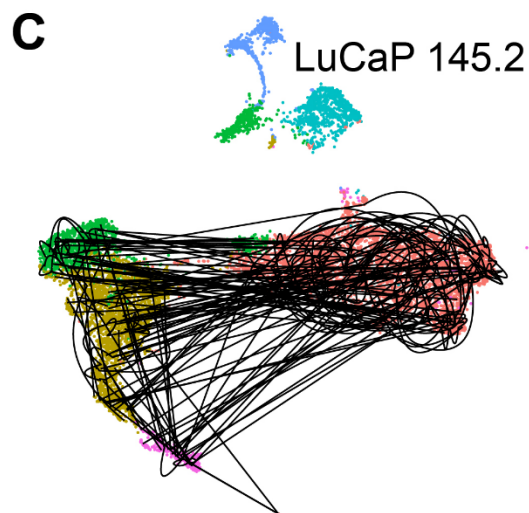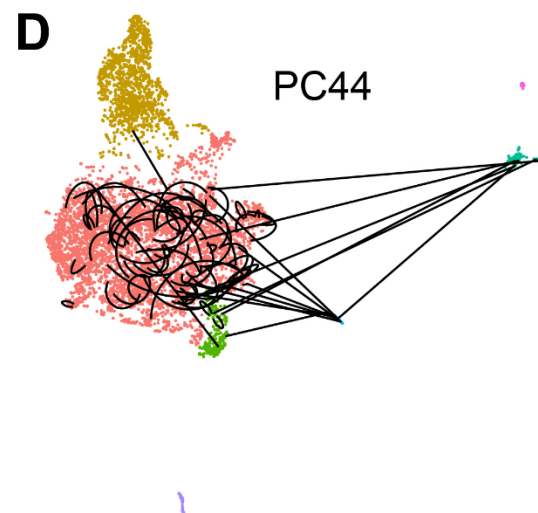

**Figure 3. Single-cell combinatorial barcoding identifies lineage-distinct and stem-like/progenitor subpopulations (A-D)** CellTag lineage-tracing analysis. (A) UMAP major clusters I and II of PC35-1 and (B) I, II, and III of PC35-2 are shown. The major clusters are further divided into annotated subclusters ( $\alpha$ - $\epsilon$ ). Each cell in a clonal population ( $\geq 2$  cells expressing the same combination of barcode IDs), is connected by a black line. Self-renewing clones that exist in the same subcluster are connected by curved lines, differentiating clones that span at least two subclusters are connected by straight lines. The tables to the right show the quantification of cells/subcluster, CellTagged clones/subcluster, and the percentage of CellTagged clones/subcluster. (C) Clonal connections as in (A) and (B) mapped onto LuCaP 145.2 and (D) PC44 UMAPs.

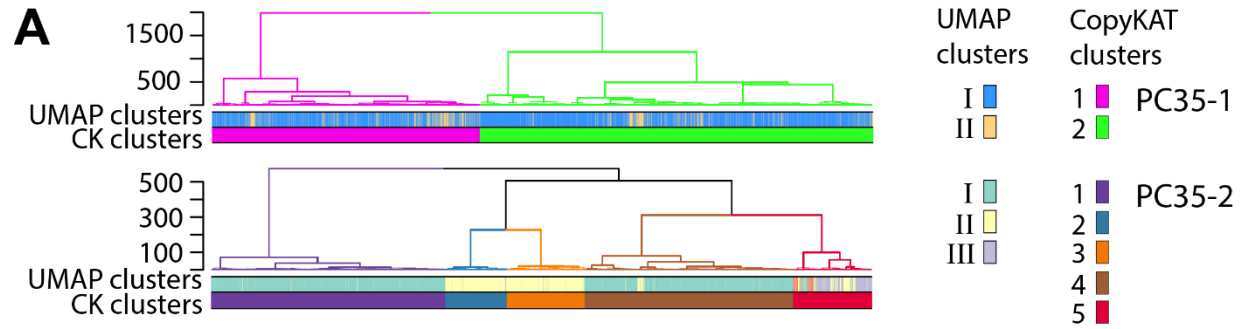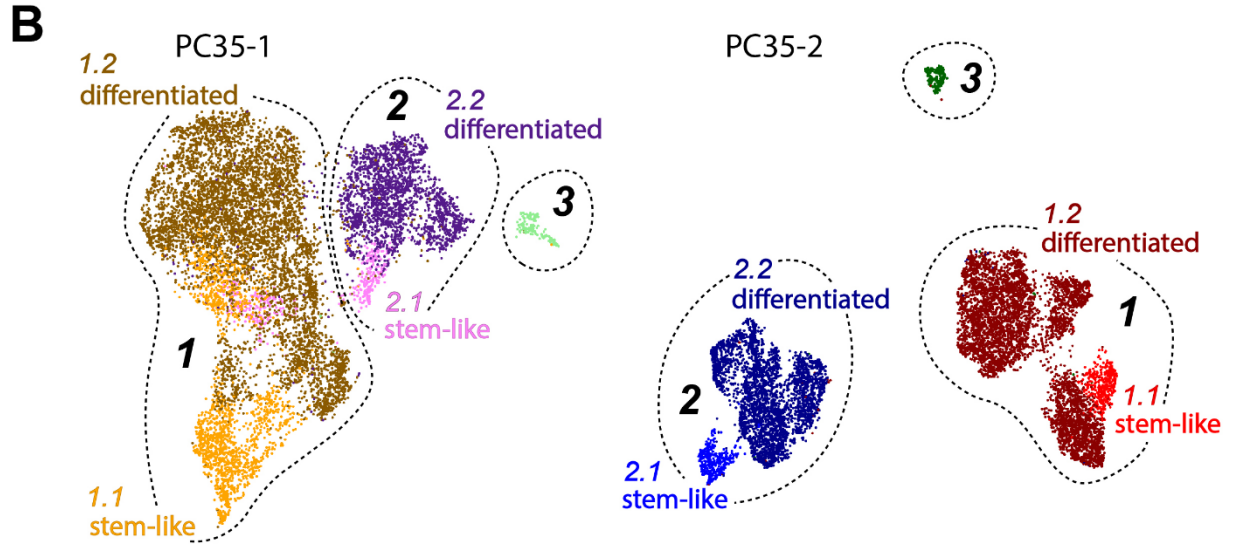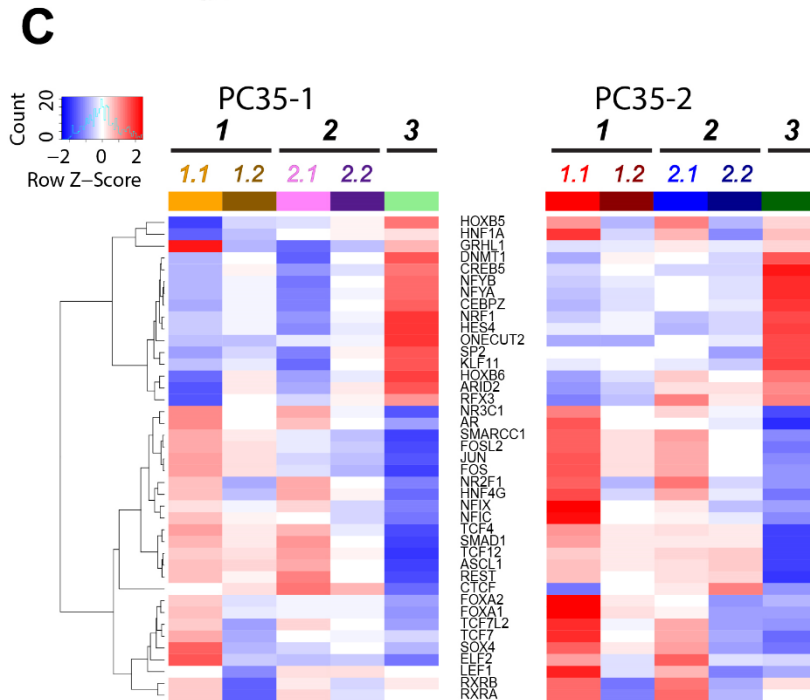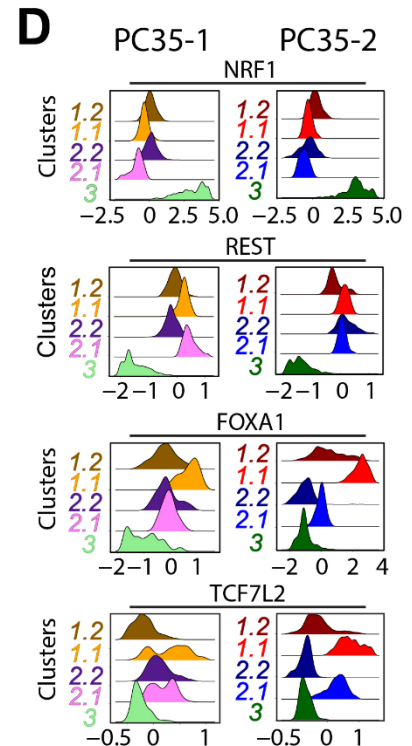

**Figure 4. Distinct states of chromatin accessibility and transcription factor activities are associated with NEPC and stem-like progenitor subpopulations in the PC35 organoids** (A) Comparison of subpopulations defined by their scRNA-seq transcriptional profile (UMAP clusters), to subclones defined by genomic CNV (CopyKAT clusters) determined using the same scRNA-seq data. Results for both PC35-1 (top) and PC35-2 (bottom) are shown. Dendrograms are colored according to CopyKAT cluster number and show the hierarchical relationships among the CopyKAT clusters. Heatmaps directly below the dendrograms show the distribution of cells from UMAP major clusters I, II, and III throughout the CopyKAT clusters. Each cell is represented by a vertical line colored according to the UMAP cluster (top row) or the CopyKAT cluster (bottom row) to which it belongs and sorted by CopyKAT cluster. PC35-2 contains two additional minor UMAP clusters lacking differentially-expressed genes that were not annotated here. (B) UMAPs of global chromatin accessibility for PC35-1 and PC35-2. Major clusters are annotated as 1, 2, 3. Clusters 1 and 2 are partitioned into two additional subclusters, stem-like and differentiated. (C) Heatmaps show inferred transcription factor (TF) activities of the listed TFs for each of the UMAP clusters/subclusters in PC35-1 and PC35-2. The heatmaps are colored by deviations z-scores for each row. Deviations z scores are the inferred transcription factor activity score. Deviations is the measure of how different the accessibility profile of a cell is for a particular transcription factor compared to the average accessibility profile for the entire dataset. Z scores are the z scored deviations. Selection of TF activity to be visualized was accomplished using the score markers function (see Methods) on the deviations z scores to identify which TFs showed the most enrichment when comparing across lineages and development. Transcription factors shown were determined to be expressed and selected from a list of the top fifty most deviant TFs. (D) Inferred transcription factor activity density plots for each cluster population. Deviations z scores are shown on the x-axis for the TF indicated at the top. Density estimates are represented along the y-axis and broken down by cluster/subcluster.

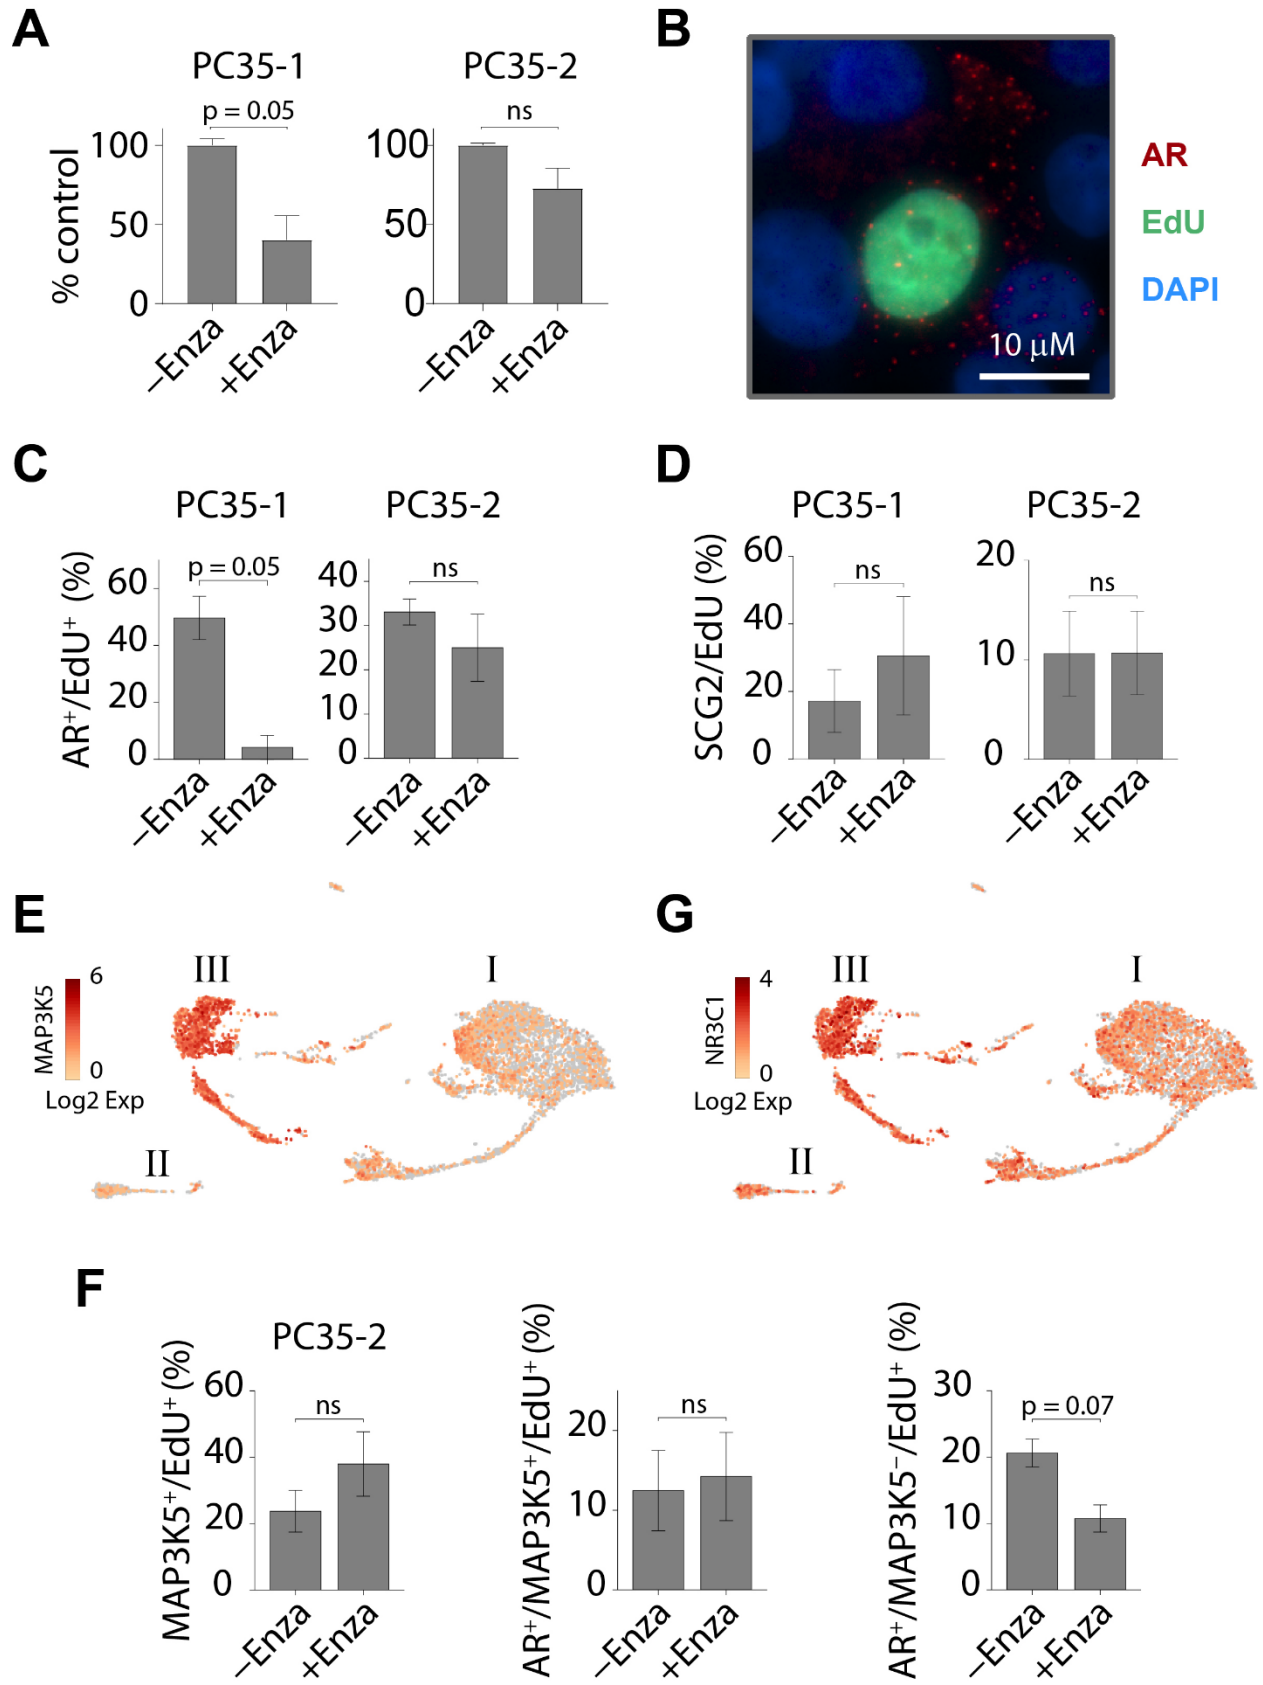



**Figure 5. PC35 organoids show subpopulation-specific sensitivity to AR inhibition (A)**

PC35-1 and PC35-2 organoids treated for six weeks with enzalutamide (10  $\mu$ M). Relative cell numbers were quantified with CellTiter Glo 3D and plotted relative to the control. (B) A representative image of a combination RNA-FISH/EdU assay on PC35-1 organoids. The organoids were pulsed for 24 hours with EdU prior to collection and then dissociated and replated in 2D on cover slips and stained for AR and EdU. (C) PC35-1 and PC35-2 organoids were treated for six weeks with enzalutamide (10  $\mu$ M). Organoids were pulsed with 10  $\mu$ M EdU for 24 hours prior to collection, then dissociated and replated in 2D on cover slips and stained for AR expression by RNA-FISH. EdU incorporation status (positive or negative) was determined for each cell (see Methods). The data was plotted as the percentage of EdU-positive cells that also expressed AR in each treatment condition. (D) PC35-1 and PC35-2 organoids were treated as in (C) and stained for SCG2 expression by RNA-FISH. EdU incorporation status (positive or negative) was determined for each cell. The data was plotted as the percentage of EdU-positive cells that also expressed SCG2 in each treatment condition. (E) PC35-2 UMAPs showing Log<sub>2</sub> expression of MAP3K5. (F) PC35-2 organoids were treated and stained for marker expression and EdU incorporation as in (C). The data was plotted as the percentage of EdU-positive cells that also expressed MAP3K5 (left), both AR and MAP3K5 (center), or AR but not MAP3K5 (right). (G) PC35-2 UMAPs showing Log<sub>2</sub> expression of NR3C1. Bar graphs are plotted as the mean of three (A) or two (C, D, F) independent experiments. Error bars,  $\pm$  SEM. P-values were calculated using the student's t-test, two-tailed, unpaired.

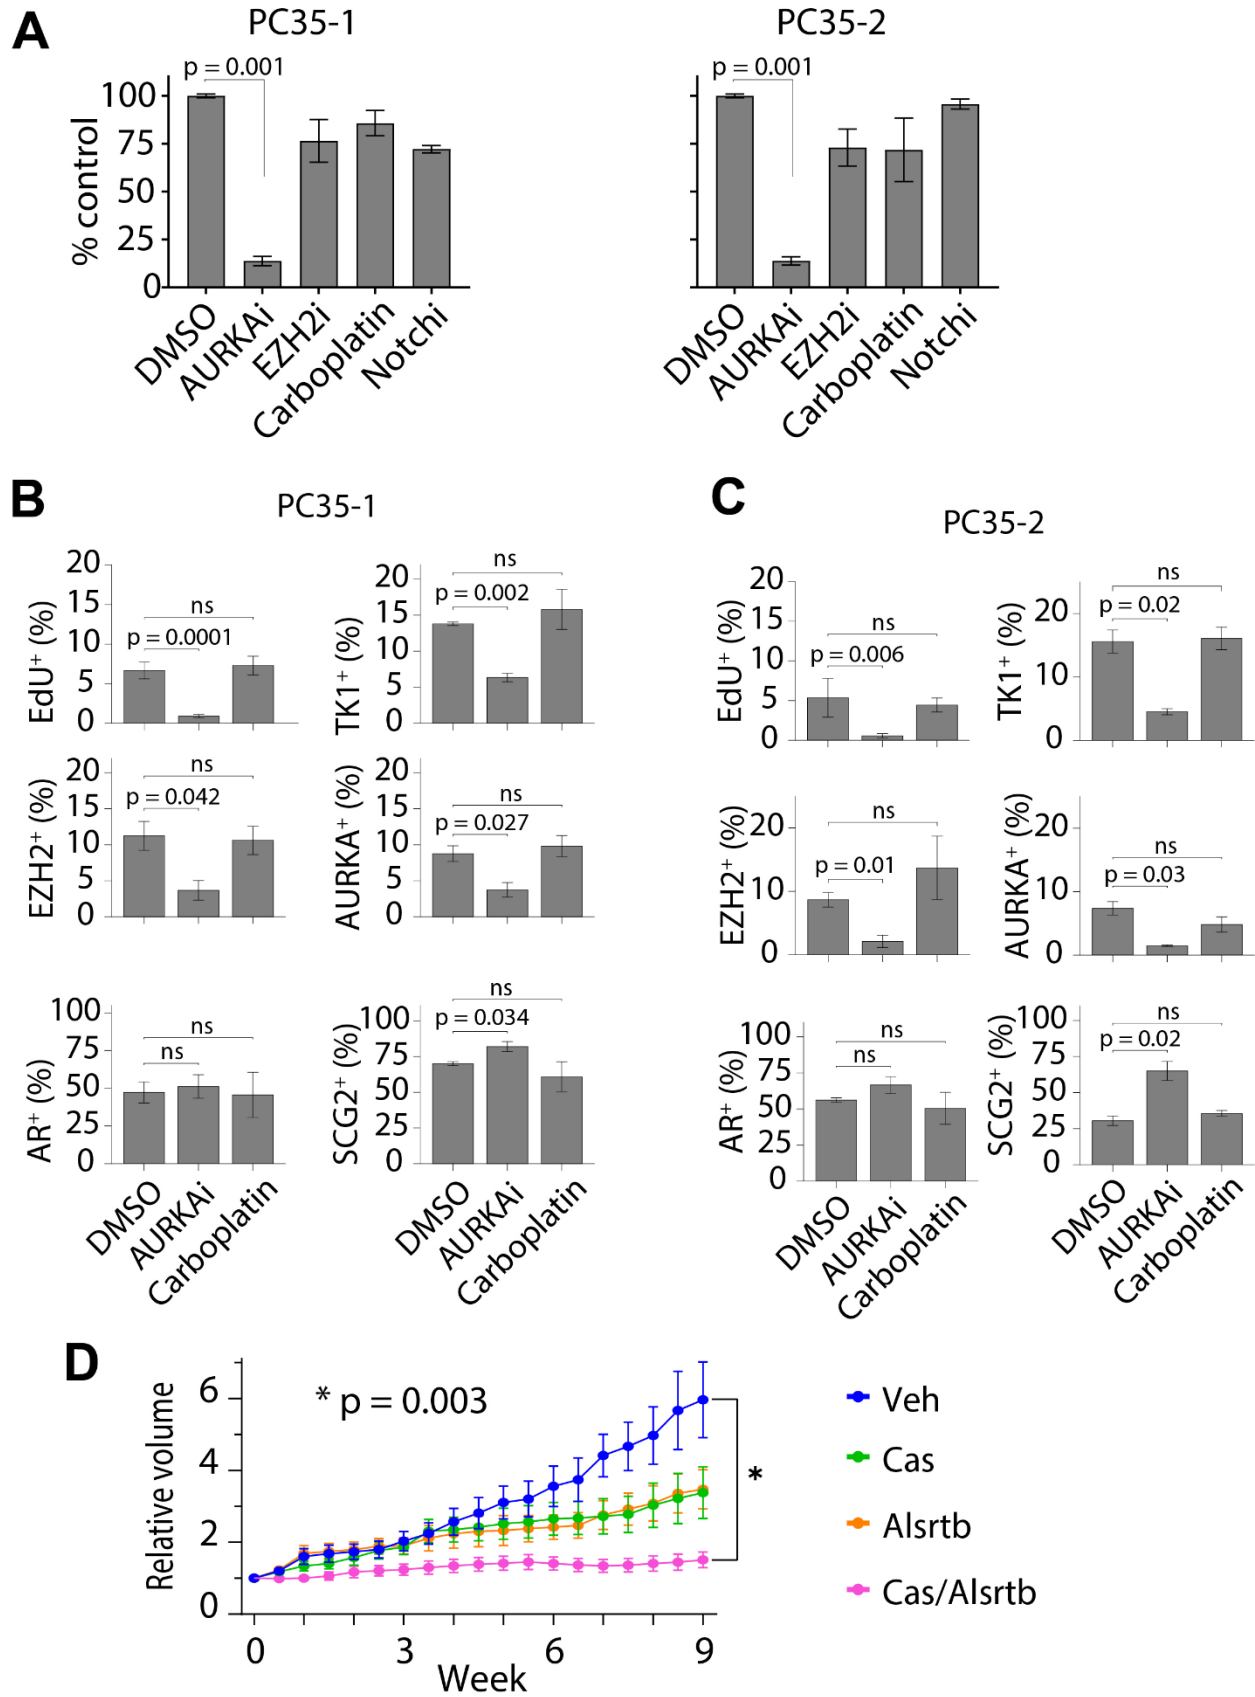

**Figure 6. The stem-like/progenitor subpopulation is vulnerable to AURKA inhibition (A)**

Drug assays. Organoids were treated twice weekly for six weeks with 500 nM AURKAi, 500 nM EZH2i, 500 nM carboplatin, 1  $\mu$ M Notchi, or 0.02% DMSO-treated controls. Quantification was done by dissociating the organoids and manually counting the cells. The quantified values for each condition were plotted relative to the DMSO controls. (B) PC35-1 and (C) PC35-2 organoids treated for six weeks as in (A) with AURKAi, carboplatin, or DMSO, then pulsed with 10  $\mu$ M EdU, 24 hours prior to collection. The indicated marker expression for each cell was determined by RNA-FISH. EdU incorporation status (positive or negative) was determined for each cell. Data was plotted as the percentage of cells that were positive for a given marker or EdU for the three treatment conditions. (D) Relative change in tumor volume for PC35-1 organoid-derived xenografts (ODXs) during nine weeks of the indicated treatments. Tumor volume was calculated as an average of the replicates. The change in volume was calculated relative to the “0” time-point. Vehicle n = 5 mice; castration n = 5 mice; alisertib n = 4 mice; castration + alisertib n = 5 mice. Bar graphs are plotted as the mean of three independent experiments. Error bars,  $\pm$  SEM. P-values were calculated using the student’s t-test, two-tailed, unpaired.
